# Supplementary material for: Metabolic flexibility via mitochondrial BCAA carrier SLC25A44 is required for optimal fever
Source: eLife. 2021 May 4;10:e66865. doi: 10.7554/eLife.66865 (PMC8137140; doi:10.7554/eLife.66865)
Supplement: Figure 1—source data 1. [file elife-66865-fig1-data1.xlsx]

## Sheet: Fig1C
		Time after ICV injection (min)
		-5	-4	-3	-2	-1	0	1	2	3	4	5	6	7	8	9	10	11	12	13	14	15	16	17	18	19	20
ΔTBAT	Saline-1	0.120292	0.156833	0.1685	0.142833	0.0813333	0	-0.0858333	-0.162667	-0.239	-0.285667	-0.267	-0.198833	-0.200167	-0.174667	-0.106	-0.114	-0.184	-0.221333	-0.142667	-0.2125	-0.359	-0.457	-0.489667	-0.551667	-0.633944	-0.716222
	Saline-2	-0.460333	-0.365833	-0.2615	-0.16	-0.0653333	0	-0.024	-0.0818333	-0.158167	-0.2435	-0.341333	-0.440667	-0.551333	-0.6615	-0.771333	-0.883833	-0.988	-1.091	-1.18833	-1.282	-1.36383	-1.439	-1.517	-1.59917	-1.68383	-1.7855
	Saline-3	-0.343	-0.148167	0.0845	0.0476667	0.00183333	0	-0.0701667	0.07	-0.014	-0.240833	-0.4525	-0.620667	-0.763333	-0.896333	-1.0295	-1.1595	-1.2865	-1.40817	-1.51917	-1.62717	-1.71183	-1.80583	-1.89417	-2.02167	-2.07083	-2.1285
	Saline-4	-0.4285	-0.307333	-0.184833	-0.054	0.0291667	0	-0.0316667	-0.0675	-0.0398333	-0.046	-0.0648333	-0.123667	-0.1885	-0.257833	-0.300333	-0.3605	-0.4355	-0.502667	-0.584833	-0.668833	-0.749667	-0.845333	-0.941167	-0.8855	-0.860667	-0.726
	Saline-5	0.345958	0.240167	0.183167	0.164667	0.0806667	0	-0.0596667	0.351667	0.550167	0.648333	0.615667	0.553	0.4675	0.456833	0.433833	0.403833	0.531667	0.588833	0.69	0.810833	0.8725	0.8285	0.8725	0.851333	0.773167	0.841167
	Saline-6	-0.198333	-0.128333	-0.075	-0.0358333	-0.00833333	0	0.00166667	-0.00833333	-0.0227778	-0.0393333	-0.0583333	-0.0791667	-0.102179	-0.126905	-0.153667	-0.181458	-0.210098	-0.239444	-0.269912	-0.301833	-0.335	-0.368788	-0.403116	-0.43875	-0.475533	-0.513333
	PGE2-1	0.0526667	0.109833	0.0736667	0.0308333	0.00483333	0	0.00983333	0.435667	0.852833	1.14367	1.37517	1.559	1.70867	1.813	1.8955	1.942	1.98917	2.01	2.00733	1.99833	1.9825	1.94167	1.904	1.86783	1.83133	1.78383
	PGE2-2	-0.262083	-0.218667	-0.133667	-0.0401667	-0.00266667	0	-0.014	-0.0308333	0.0821667	0.461667	0.767167	0.978333	1.12283	1.23367	1.32483	1.39017	1.42917	1.4595	1.47533	1.48967	1.50117	1.5245	1.54983	1.56033	1.5635	1.5405
	PGE2-3	-0.578167	-0.578167	-0.149167	-0.0598333	-0.00666667	0	0.0095	0.1415	0.417	0.653333	0.839833	0.9965	1.12333	1.28267	1.4625	1.62933	1.7805	1.91	2.023	2.13233	2.23183	2.315	2.3835	2.44817	2.49433	2.52017
	PGE2-4	-1.03117	-1.64133	-1.7645	-0.0636667	-0.022	0	0.0231667	0.0713333	0.414833	1.2715	1.83917	2.23883	2.5705	2.86217	3.13633	3.39383	3.631	3.84067	4.05833	4.28133	4.45483	4.5915	4.66633	4.60317	4.7405	4.75333
	PGE2-5	0.264625	0.128333	0.0475	0.238667	0.100333	0	0.298167	1.13	1.62783	1.94533	2.168	2.30217	2.4045	2.52517	2.63917	2.74433	2.83583	2.91067	2.98133	3.04167	3.08017	3.115	3.13883	3.12833	3.08917	3.06067
	PGE2-6	-0.804833	-0.804833	-0.804833	0.469833	0.0811667	0	-0.145833	-0.1395	0.248333	0.591333	0.848333	1.11267	1.28417	1.43783	1.67517	1.8385	1.9055	1.98183	2.059	2.14367	2.27533	2.35933	2.40183	2.48333	2.55267	2.63733
ΔTRec	Saline-1	0.0898333	0.160167	0.184167	0.160167	0.096	0	-0.106667	-0.214333	-0.339833	-0.447833	-0.542	-0.610667	-0.670333	-0.7295	-0.766667	-0.791333	-0.841	-0.8965	-0.9145	-0.927667	-0.997833	-1.07967	-1.1575	-1.22583	-1.30193	-1.37802
	Saline-2	-0.410042	-0.329667	-0.2335	-0.144	-0.0561667	0	0.00633333	-0.0326667	-0.105833	-0.196167	-0.283833	-0.383667	-0.496333	-0.602833	-0.711167	-0.8295	-0.952833	-1.08317	-1.1945	-1.30617	-1.414	-1.523	-1.62967	-1.73933	-1.84267	-1.947
	Saline-3	0.067375	0.106667	0.166667	0.143333	0.106167	0	-0.100167	-0.087	-0.111667	-0.178833	-0.275833	-0.365333	-0.472	-0.5885	-0.703667	-0.8255	-0.951	-1.07367	-1.19083	-1.30833	-1.42033	-1.53433	-1.6415	-1.7495	-1.80017	-1.67
	Saline-4	-0.583458	-0.464333	-0.285833	-0.152667	-0.0451667	0	-0.005	-0.0611667	-0.110667	-0.117667	-0.202	-0.271167	-0.341833	-0.407	-0.463667	-0.545167	-0.633833	-0.711667	-0.799333	-0.881167	-0.977333	-1.06617	-1.163	-1.1765	-1.05617	-0.849833
	Saline-5	-0.127875	-0.0378333	0.0366667	0.0975	0.0628333	0	-0.072	-0.0808333	-0.021	0.0291667	0.0608333	0.0663333	0.0525	0.0355	0.0256667	0.0045	0.00833333	0.00366667	-0.000166667	0.0198333	0.0398333	0.0353333	0.0435	0.0551667	0.025	0.0313333
	Saline-6	-0.226667	-0.156667	-0.0966667	-0.0491667	-0.0186667	0	0.00761905	0.00458333	-0.00666667	-0.0236667	-0.0439394	-0.0675	-0.0920513	-0.11881	-0.147333	-0.177292	-0.20902	-0.241667	-0.275614	-0.310667	-0.346667	-0.383939	-0.421449	-0.460417	-0.500267	-0.540513
	PGE2-1	0.106	0.198833	0.187	0.126	0.0675	0	-0.0826667	-0.113	0.0085	0.197333	0.395333	0.5715	0.721667	0.836833	0.922333	0.979667	1.0275	1.063	1.07367	1.0735	1.0705	1.05083	1.02633	0.996167	0.963	0.927333
	PGE2-2	-0.158667	-0.133833	-0.104167	-0.032	0.0161667	0	-0.0771667	-0.160333	-0.272167	-0.291	-0.162833	-0.0015	0.136833	0.247167	0.3365	0.409333	0.461333	0.4945	0.515	0.527333	0.537	0.55	0.570167	0.582667	0.588333	0.578333
	PGE2-3	-0.325125	-0.164333	-0.0226667	0.0466667	0.0481667	0	-0.0545	-0.1445	-0.108333	0.0356667	0.194333	0.348333	0.485833	0.612667	0.7515	0.902667	1.05267	1.1885	1.30917	1.42083	1.52283	1.61583	1.69217	1.76133	1.82	1.8595
	PGE2-4	-0.267	-0.150167	-0.0873333	-0.046	-0.00166667	0	-0.00233333	-0.0341667	-0.0518333	0.255167	0.675	1.04	1.36467	1.6545	1.92417	2.17883	2.41383	2.62317	2.82817	3.0335	3.20967	3.35067	3.446	3.43667	3.52567	3.58833
	PGE2-5	-0.212292	-0.137	-0.0846667	-0.0391667	0.00266667	0	-0.0265	0.0241667	0.232833	0.485167	0.7115	0.874333	0.988	1.08583	1.18133	1.27667	1.36817	1.44817	1.5205	1.58667	1.63817	1.6805	1.71617	1.73217	1.732	1.7275
	PGE2-6	-0.331875	-0.0966667	0.022	0.0208333	0.00783333	0	-0.001	-0.0496667	0.0538333	0.263167	0.457833	0.6255	0.772	0.897667	1	1.102	1.18783	1.25917	1.31667	1.37517	1.457	1.52183	1.56817	1.62767	1.69017	1.74417

## Sheet: Fig1E
	Plasma BCAAs (μM)
	Basal	After ICV
Saline-1	743.721	587.056
Saline-2	776.47	821.611
Saline-3	564.486	461.813
Saline-4	622.224	527.094
Saline-5	534.381	548.562
Saline-6	505.231	513.898
PGE2-1	741.951	545.235
PGE2-2	402.068	450.971
PGE2-3	715.619	406.715
PGE2-4	787.977	603.874
PGE2-5	509.167	407.158
PGE2-6	576.878	269.966

## Sheet: Fig1F
	Relative [1-14C] Val oxidation in BAT (cpm mg-1)
Saline-1	1.42885
Saline-2	0.6889
Saline-3	0.921968
Saline-4	0.960285
PGE2-1	2.77397
PGE2-2	1.78072
PGE2-3	2.06243
PGE2-4	2.53488

## Sheet: Fig1G
	Relative [1-14C] Val oxidation in BAT (cpm mg-1)
Contorl-1	0.725868
Contorl-2	1.32754
Contorl-3	0.926294
Contorl-4	1.34902
Contorl-5	0.671281
Stress-1	1.20015
Stress-2	2.13429
Stress-3	1.48913
Stress-4	1.46074
Stress-5	1.9722
