# Supplementary material for: Metabolic flexibility via mitochondrial BCAA carrier SLC25A44 is required for optimal fever
Source: eLife. 2021 May 4;10:e66865. doi: 10.7554/eLife.66865 (PMC8137140; doi:10.7554/eLife.66865)
Supplement: Figure 2—source data 1. [file elife-66865-fig2-data1.xlsx]

## Sheet: Fig2C
		Time after ICV injection of PGE2 (min)
		-5	-4	-3	-2	-1	0	1	2	3	4	5	6	7	8	9	10	11	12	13	14	15	16	17	18	19	20	21	22	23	24	25	26	27	28	29	30	31	32	33	34	35	36	37	38	39	40	41	42
ΔTBAT	TN-acclimated-1	-0.169	-0.2295	-0.1955	-0.117833	-0.0571667	0	0.0651667	-0.00783333	0.000833333	0.4665	0.966	1.2915	1.5045	1.6505	1.77233	1.87067	1.96033	2.03067	2.1015	2.15783	2.21817	2.26667	2.297	2.31983	2.36	2.38067	2.388	2.39967	2.379	2.36617	2.401	2.422	2.43633	2.4365	2.4555	2.39733	2.33567	2.26433	2.21283	2.154	2.086	2.01917	1.953	1.88517	1.838	1.742	1.648	1.59617
	TN-acclimated-2	0.163167	0.0908333	0.0558333	0.0356667	0.00633333	0	0.0716667	0.3335	0.692167	0.997	1.22317	1.39467	1.5275	1.647	1.76517	1.85417	1.936	2.02067	2.1095	2.198	2.2785	2.35517	2.41967	2.48017	2.53083	2.58467	2.65133	2.73117	2.8615	2.97167	3.04133	3.09917	3.1255	3.117	3.1125	3.14383	3.13933	3.07633	2.98017	2.854	2.87283	2.82567	2.75533	2.76667	2.666	2.60633	2.46683	2.36233
	TN-acclimated-3	0.39	0.263333	0.1965	0.101	-0.006	0	-0.0075	0.023	0.123833	0.2035	0.245	0.305	0.337667	0.381833	0.433167	0.468667	0.511167	0.513833	0.485167	0.534833	0.5315	0.547833	0.571167	0.539167	0.5655	0.585167	0.628333	0.6425	0.710333	0.936	0.9405	0.937	0.9495	1.01667	1.0815	1.22583	1.3375	1.4185	1.49517	1.57267	1.64517	1.721	1.785	1.85	1.92017	1.98433	2.0375	2.10283
	TN-acclimated-4	0.181333	0.0718333	-0.0183333	-0.0641667	-0.0843333	0	0.0335	0.0856667	0.193667	0.444333	0.5855	0.714333	0.8455	0.966333	1.05067	1.10417	1.153	1.232	1.32383	1.4275	1.51317	1.5845	1.67	1.73717	1.80567	1.8825	1.97133	2.04233	2.08867	2.13117	2.15583	2.188	2.18083	2.15467	2.13467	2.055	1.9745	2.00733	2.03233	2.04717	2.06217	2.0555	2.049	2.03933	1.963	1.82517	1.7955	1.83683
	TN-acclimated-5	-0.223167	-0.175333	-0.1335	-0.0876667	-0.0513333	0	0.0101667	-0.0045	-0.0215	-0.0213333	0.181333	0.550167	0.845333	1.02917	1.123	1.21317	1.27383	1.32333	1.336	1.34117	1.32667	1.309	1.30167	1.29783	1.28917	1.25	1.19067	1.14267	1.08133	1.02567	0.96	0.927833	1.02633	1.03933	1.10017	1.1375	1.13467	1.13583	1.11067	1.03367	0.956	1.0585	1.11567	1.22733	1.22867	1.17767	1.08767	1.108
	Cold-acclimated-1	-0.126	-0.0606667	-0.0171667	0.003	0.0138333	0	-0.013	-0.00566667	0.307667	0.719167	1.066	1.35867	1.65833	1.9605	2.24767	2.51483	2.76483	3.00083	3.24417	3.4395	3.67167	3.82217	3.933	3.97933	3.98367	3.967	3.91733	3.843	3.76	3.665	3.55817	3.4915	3.48733	3.356	3.19117	3.12433	2.993	2.82833	2.65467	2.474	2.45883	2.322	2.11983	1.99233	1.8535	1.68817	1.67783	1.57583
	Cold-acclimated-2	0.4255	0.3445	0.2495	0.151667	0.0703333	0	-0.0528333	-0.0703333	0.2425	0.715667	1.10267	1.4375	1.71483	1.977	2.24217	2.48633	2.734	2.99067	3.22717	3.47133	3.57317	3.70967	3.84733	3.88267	3.857	3.75033	3.94933	4.1155	4.14683	4.1095	3.98633	3.85117	3.72483	3.66217	3.6645	3.54033	3.3455	3.14117	2.92233	2.83333	2.79067	2.678	2.55583	2.40283	2.26283	2.1255	2.035	1.97467
	Cold-acclimated-3	0.0865	0.0786667	0.0751667	0.0645	0.036	0	0.142	0.777333	1.12767	1.326	1.471	1.57733	1.64717	1.704	1.73217	1.73917	1.73467	1.7145	1.70067	1.76117	1.75633	1.73467	1.6825	1.65667	1.5775	1.53683	1.58117	1.53	1.36067	1.3435	1.18217	1.24067	1.12817	0.943833	0.754	1.1175	1.36217	1.4785	1.5695	1.6325	1.682	1.72983	1.78383	1.833	1.8825	1.932	1.97033	1.992
	Cold-acclimated-4	0.277333	0.197167	0.122333	0.0858333	0.036	0	0.00466667	0.135833	0.783167	1.3035	1.7265	2.09	2.4115	2.7225	3.025	3.33	3.70767	4.12617	4.474	4.76667	4.98117	5.1295	5.20983	5.26983	5.30417	5.22367	5.1015	5.01483	4.85533	4.70483	4.5455	4.24133	4.07233	3.90667	3.73417	3.55983	3.396	3.232	3.0925	3.043	2.94583	2.801	2.66367	2.52833	2.38567	2.27433	2.14883	2.02083
	Cold-acclimated-5	0.06	0.0411667	-0.0188333	-0.0178333	-0.0125	0	0.0653333	0.241	0.467	0.665	0.849667	1.01933	1.17833	1.30933	1.45233	1.6155	1.793	1.962	2.11917	2.25917	2.378	2.45617	2.59867	2.71317	2.734	2.68833	2.6445	2.63783	2.66317	2.667	2.61967	2.56617	2.51083	2.381	2.24083	2.12833	2.0155	1.90833	1.79933	1.68817	1.58067	1.49033	1.387	1.33867	1.26967	1.27333	1.2915	1.353
ΔTRec	TN-acclimated-1	-0.124667	0.130833	0.221833	0.1875	0.0935	0	-0.129333	-0.243333	-0.370167	-0.4755	-0.558	-0.6085	-0.616167	-0.615833	-0.604667	-0.578167	-0.551	-0.504833	-0.4735	-0.449	-0.431833	-0.404667	-0.366833	-0.348167	-0.326167	-0.315833	-0.298667	-0.288167	-0.286167	-0.292833	-0.308667	-0.310333	-0.307833	-0.2975	-0.286167	-0.271667	-0.286	-0.294	-0.323167	-0.3675	-0.422667	-0.4765	-0.529667	-0.597	-0.651	-0.712	-0.78	-0.849833
	TN-acclimated-2	0.0386667	0.0963333	0.114333	0.108667	0.0723333	0	-0.0788333	-0.155833	-0.139833	-0.0338333	0.103167	0.237833	0.36	0.470333	0.578667	0.667167	0.745667	0.827667	0.904	0.986667	1.06583	1.14233	1.213	1.272	1.32067	1.36767	1.41533	1.4645	1.53233	1.5875	1.66317	1.73117	1.77783	1.80067	1.81367	1.81317	1.82583	1.81633	1.76933	1.67817	1.643	1.61817	1.55433	1.5385	1.487	1.42683	1.34933	1.25067
	TN-acclimated-3	0.501667	0.424167	0.350167	0.231167	0.119167	0	-0.0965	-0.114	-0.121	-0.118	-0.1055	-0.0613333	-0.0633333	-0.058	-0.0333333	-0.014	-0.022	-0.0238333	-0.00533333	0.00616667	-0.0085	-0.0156667	-0.0126667	-0.0136667	-0.007	-0.0268333	-0.0136667	0.0105	0.0351667	0.0246667	0.0341667	0.0661667	0.103167	0.1615	0.2095	0.2615	0.327833	0.4005	0.467	0.532	0.597667	0.6675	0.743	0.819333	0.889833	0.951667	1.01467	1.08467
	TN-acclimated-4	0.566167	0.434833	0.3005	0.176833	0.0783333	0	-0.071	-0.0856667	-0.0353333	0.0723333	0.221167	0.3495	0.4645	0.572667	0.662	0.726833	0.771333	0.824	0.8915	0.973167	1.06317	1.13883	1.218	1.29283	1.369	1.441	1.51167	1.58367	1.646	1.70583	1.75117	1.775	1.7985	1.7975	1.79367	1.75583	1.68617	1.6635	1.67017	1.67633	1.66533	1.66583	1.656	1.6445	1.6055	1.50933	1.4615	1.46633
	TN-acclimated-5	-0.171333	-0.1045	-0.0611667	-0.0125	0.0158333	0	-0.0258333	-0.0668333	-0.1185	-0.171	-0.216833	-0.206167	-0.147333	-0.0738333	-0.0101667	0.043	0.0926667	0.131667	0.154667	0.169	0.164667	0.147	0.130667	0.117167	0.1055	0.0846667	0.0416667	-0.000333333	-0.0446667	-0.106167	-0.164167	-0.208	-0.161667	-0.111167	-0.0823333	-0.0428333	-0.0258333	-0.0248333	-0.0316667	-0.0676667	-0.1145	-0.1075	-0.0666667	-0.0241667	0.021	0.0348333	-0.0143333	-0.0326667
	Cold-acclimated-1	0.175333	0.2415	0.214	0.156	0.0833333	0	-0.0816667	-0.1705	-0.237833	-0.2105	-0.0966667	0.0703333	0.25	0.491833	0.77	1.01583	1.28417	1.53817	1.80483	2.05633	2.2535	2.44533	2.59083	2.751	2.9445	3.089	3.10717	3.092	3.06917	2.972	2.907	2.8135	2.77067	2.72317	2.6545	2.59383	2.45783	2.3395	2.23	2.09983	1.95333	1.82033	1.68817	1.56067	1.45	1.313	1.21083	1.1105
	Cold-acclimated-2	0.280333	0.172	0.0746667	0.0998333	0.0615	0	-0.0531667	-0.143667	-0.228167	-0.249167	-0.188167	-0.08	0.0765	0.275167	0.467833	0.636	0.822167	1.05967	1.2875	1.54417	1.71517	1.85517	1.9865	2.09233	2.17717	2.2365	2.24567	2.28117	2.35117	2.41317	2.43367	2.42017	2.41533	2.40683	2.35567	2.28017	2.22183	2.14267	2.07167	1.94717	1.84133	1.75117	1.65933	1.56633	1.4615	1.3585	1.22483	1.1145
	Cold-acclimated-3	0.137833	0.203167	0.189667	0.140167	0.0735	0	-0.0623333	-0.112167	-0.064	0.0468333	0.164	0.271333	0.356333	0.428333	0.482167	0.516	0.531667	0.531333	0.5155	0.509167	0.509667	0.496667	0.483333	0.449833	0.4135	0.376167	0.335667	0.326667	0.275833	0.2155	0.16	0.0983333	0.0528333	-0.0213333	-0.122833	-0.1895	-0.125333	-0.0236667	0.0655	0.144	0.207167	0.261833	0.312167	0.364333	0.411167	0.457667	0.508	0.547
	Cold-acclimated-4	0.1055	0.0438333	0.0643333	0.0776667	0.0478333	0	-0.0648333	-0.131333	-0.166333	-0.0641667	0.147167	0.409833	0.7	0.992833	1.296	1.60517	1.89733	2.24667	2.60567	2.92467	3.195	3.40983	3.52533	3.60433	3.6555	3.68733	3.701	3.6905	3.63967	3.5515	3.47817	3.4075	3.31	3.189	3.08	2.96317	2.83667	2.70167	2.5525	2.4125	2.30567	2.19017	2.07117	1.95483	1.82383	1.6955	1.594	1.48783
	Cold-acclimated-5	0.253667	0.204833	0.142667	0.076	0.0298333	0	0.00116667	0.0195	0.0976667	0.2025	0.324167	0.456	0.601333	0.743167	0.881833	1.02817	1.19167	1.34267	1.49433	1.63933	1.76733	1.883	1.994	2.11117	2.176	2.18567	2.1545	2.16017	2.18683	2.20817	2.23167	2.22217	2.189	2.07817	1.99117	1.90717	1.82933	1.76433	1.68083	1.59533	1.4885	1.39283	1.27567	1.18183	1.03383	0.972167	0.9525	0.9555
ΔTIng	TN-acclimated-1	-0.233667	0.0835	0.212167	0.1915	0.113333	0	-0.118	-0.2455	-0.382667	-0.516333	-0.654333	-0.784167	-0.888667	-0.967333	-1.034	-1.0805	-1.1095	-1.117	-1.12767	-1.152	-1.16317	-1.16117	-1.15367	-1.15167	-1.14633	-1.14333	-1.13367	-1.133	-1.14	-1.14567	-1.15583	-1.16967	-1.182	-1.1885	-1.20183	-1.18383	-1.166	-1.169	-1.19	-1.20767	-1.23367	-1.25867	-1.29533	-1.33483	-1.3835	-1.4295	-1.47967	-1.53717
	TN-acclimated-2	-0.201167	-0.1095	-0.0471667	0.0123333	0.0128333	0	-0.0345	-0.151833	-0.269167	-0.358333	-0.407667	-0.416667	-0.398167	-0.364833	-0.324833	-0.262833	-0.222167	-0.181667	-0.1305	-0.0938333	-0.0448333	0.00383333	0.0518333	0.105333	0.1505	0.1965	0.256167	0.322167	0.352833	0.426333	0.4725	0.520333	0.618167	0.688667	0.729833	0.783333	0.818333	0.805	0.795	0.865	0.943	0.922833	0.9055	0.940333	0.909833	0.8965	0.842333	0.793333
	TN-acclimated-3	0.7495	0.567333	0.4135	0.306167	0.156	0	-0.312333	-0.513833	-0.646833	-0.7235	-0.825	-0.885833	-0.939	-0.967833	-0.967167	-0.994333	-1.025	-1.0435	-1.02667	-1.05533	-1.069	-1.08483	-1.092	-1.12017	-1.13683	-1.09983	-1.0665	-1.068	-1.04283	-1.18267	-1.28983	-1.3015	-1.251	-1.20033	-1.154	-1.1175	-1.0935	-1.05133	-1.0015	-0.963	-0.925833	-0.898667	-0.855833	-0.789	-0.759	-0.6865	-0.608667	-0.544833
	TN-acclimated-4	0.661167	0.507833	0.371333	0.232	0.151667	0	-0.263333	-0.502	-0.650167	-0.706	-0.826167	-0.921833	-0.938333	-0.918667	-0.869333	-0.813833	-0.723333	-0.581667	-0.455667	-0.364167	-0.3005	-0.237667	-0.171	-0.147	-0.0921667	-0.0313333	0.0301667	0.106167	0.176833	0.215	0.2695	0.349667	0.394833	0.33	0.301	0.275333	0.295	0.2745	0.2585	0.3015	0.3345	0.3065	0.2485	0.2275	0.179833	0.185167	0.1235	0.0626667
	TN-acclimated-5	-0.214667	-0.1385	-0.044	0.0248333	0.0323333	0	-0.018	-0.0225	-0.0248333	-0.0583333	-0.127333	-0.178	-0.238833	-0.290667	-0.305833	-0.305	-0.303333	-0.3005	-0.287667	0.124	0.2155	0.2625	0.2825	0.2775	0.264	0.247333	0.227167	0.198333	0.164167	0.1265	0.0903333	0.0311667	-0.0266667	-0.0858333	-0.135	-0.145667	-0.140667	-0.122667	-0.104333	-0.0863333	-0.0831667	-0.0933333	-0.0928333	-0.0965	-0.0953333	-0.0821667	-0.075	-0.0696667
	Cold-acclimated-1	0.0518333	0.151667	0.167167	0.113833	0.0681667	0	-0.077	-0.141167	-0.163833	-0.153667	-0.108833	-0.025	0.108667	0.274333	0.473	0.696	0.938167	1.19233	1.44067	1.75867	1.946	2.12417	2.288	2.4195	2.52733	2.60383	2.65533	2.69683	2.7155	2.684	2.65133	2.613	2.546	2.5095	2.42783	2.338	2.25717	2.152	2.04817	1.96917	1.86767	1.76933	1.66467	1.54367	1.43117	1.31417	1.18267	1.08917
	Cold-acclimated-2	0.238667	0.1605	0.099	0.0858333	0.0455	0	-0.056	-0.099	-0.151	-0.168833	-0.162833	-0.114667	-0.00366667	0.144	0.3115	0.485	0.6615	0.854	1.052	1.23817	1.4455	1.61317	1.76017	1.89933	2.0375	2.123	2.10283	2.13383	2.2185	2.305	2.358	2.359	2.35467	2.363	2.25717	2.20367	2.164	2.11383	2.09017	1.96183	1.842	1.73583	1.6455	1.5495	1.44767	1.341	1.2055	1.08267
	Cold-acclimated-3	-0.0226667	0.055	0.0713333	0.0336667	0.0255	0	-0.0431667	-0.0528333	-0.0156667	0.0561667	0.141333	0.238833	0.332167	0.408333	0.480333	0.528833	0.566667	0.584167	0.583	0.590667	0.602167	0.603	0.603167	0.589	0.5675	0.543	0.501	0.496	0.455667	0.388	0.339667	0.293833	0.266333	0.206333	0.133667	0.0331667	0.0316667	0.0656667	0.114667	0.170167	0.237167	0.296667	0.331167	0.372667	0.4115	0.450667	0.490667	0.520333
	Cold-acclimated-4	0.0515	0.00533333	0.027	0.0593333	0.0361667	0	-0.0328333	-0.0816667	-0.0988333	-0.0841667	0.0231667	0.173	0.363667	0.594833	0.822167	1.08333	1.37467	1.69917	2.035	2.35067	2.62233	2.8635	3.061	3.21583	3.3365	3.40167	3.419	3.4365	3.41267	3.37783	3.31617	3.20017	3.08233	2.97667	2.88917	2.7585	2.62667	2.51017	2.37983	2.30133	2.19833	2.092	1.99483	1.866	1.72483	1.63033	1.51917	1.40583
	Cold-acclimated-5	0.542667	0.408833	0.279667	0.158667	0.0851667	0	-0.0851667	-0.162667	-0.2155	-0.207833	-0.150833	-0.0575	0.036	0.132667	0.2155	0.342333	0.444667	0.551667	0.634833	0.733167	0.840333	0.947	1.05317	1.14967	1.22383	1.32117	1.51967	1.572	1.61	1.65833	1.74	1.789	1.80517	1.76383	1.70833	1.67517	1.60983	1.55583	1.45267	1.372	1.28317	1.176	1.10083	1.03267	0.9645	0.839667	0.745	0.694333
[truncated: 18 more columns]

## Sheet: Fig2D
		Time after ICV injection of PGE2 (min)
		-5	-4	-3	-2	-1	0	1	2	3	4	5	6	7	8	9	10	11	12	13	14	15	16	17	18	19	20	21	22	23	24	25	26	27	28	29	30	31	32	33	34	35	36	37	38	39	40	41	42
ΔTBAT	Saline-1	-0.196333	-0.138333	-0.0875	-0.0425	-0.0111667	0	-0.021	0.0385	0.301167	0.545	0.7735	0.981	1.161	1.318	1.449	1.57567	1.69067	1.79017	1.87783	1.95433	2.01567	2.0655	2.1155	2.1545	2.18533	2.20467	2.2205	2.22867	2.23133	2.22767	2.2155	2.19617	2.17533	2.14767	2.11683	2.07783	2.0475	2.00517	1.95833	1.9115	1.86083	1.804	1.7465	1.7705	1.7545	1.75283	1.80833	1.84267
	Saline-2	-0.0388333	-0.0151667	0	-0.0388333	-0.0151667	0	0.0815	0.0876667	0.085	0.0648333	0.0353333	0.0171667	0.001	-0.0241667	-0.008	0.0695	0.141667	0.2035	0.262333	0.307	0.352667	0.389833	0.422333	0.452	0.481833	0.517333	0.545	0.574833	0.602	0.623167	0.650833	0.679833	0.7235	0.7705	0.8195	0.8755	0.980833	1.08967	1.19633	1.28217	1.355	1.42	1.52117	1.62733	1.64417	1.66183	1.699	1.72
	Saline-3	0.199718	0.0431667	-0.049	-0.0333333	-0.0176667	0	-0.0103333	-0.0543333	0.0826667	0.375833	0.619667	0.797167	0.924667	1.0135	1.08567	1.14267	1.18967	1.23567	1.28667	1.324	1.34933	1.4	1.43967	1.47083	1.49333	1.51983	1.55333	1.56917	1.59383	1.61	1.62217	1.63383	1.63567	1.64417	1.63983	1.63617	1.632	1.61583	1.59367	1.5855	1.54283	1.54767	1.556	1.54483	1.47417	1.46767	1.46783	1.41417
	Saline-4	0.319545	0.267403	0.125795	0.0245455	0.0345455	0	-0.0321212	-0.0262238	-0.0768831	-0.0394545	0.0276705	0.10984	0.171212	0.272967	0.301045	0.343593	0.380909	0.411937	0.481212	0.540545	0.643392	0.667508	0.758474	0.790063	0.855545	0.877126	0.853295	0.794242	0.813075	1.00369	1.23121	1.41373	1.56928	1.70608	1.8123	1.89259	1.97859	2.06664	2.10977	2.06077	2.06781	2.00242	2.02746	2.00842	1.98495	1.88062	1.80935	1.78096
	CL-316,243-1	0.327667	0.269	0.215667	0.146667	0.0648333	0	0.1855	0.7625	1.47617	1.99017	2.401	2.73817	3.03117	3.29033	3.522	3.72833	3.90983	4.0585	4.23867	4.42517	4.5835	4.71433	4.8315	4.892	4.96333	5.044	5.14617	5.19583	5.20083	5.12833	4.99717	4.61217	4.19283	3.816	3.53417	3.39767	3.266	3.198	3.1995	3.463	3.59617	3.613	3.459	3.30967	3.28	3.192	3.22183	3.22383
	CL-316,243-2	0.309167	0.259667	0.231167	0.164667	0.07	0	-0.089	-0.091	0.312833	0.660167	1.02267	1.34483	1.542	1.66367	1.75983	1.91633	2.01233	2.0215	2.15783	2.25367	2.32833	2.61083	2.8165	2.96467	3.088	3.21617	3.28367	3.391	3.46933	3.4605	3.46983	3.51817	3.49683	3.49567	3.50233	3.43417	3.31617	3.2355	3.15633	3.07183	3.046	3.032	2.976	2.9	2.841	2.77033	2.676	2.60133
	CL-316,243-3	0.428667	0.171667	-0.234667	-1.45283	-0.344667	0	-0.0681667	-0.1155	-0.0996667	0.4315	1.45367	1.92417	2.32133	2.72467	3.08817	3.413	3.6145	3.45917	3.4095	3.443	3.49167	3.48683	3.66433	3.75617	4.00783	4.05933	3.95333	3.703	3.9095	3.87183	3.72567	3.23333	3.001	2.72217	2.35467	2.23	2.04483	1.8055	1.74233	1.44867	1.55167	1.3375	1.179	1.17967	0.9725	0.7255	0.494167	0.398833
	CL-316,243-4	-0.367583	-0.226833	-0.134333	-0.053	-0.00716667	0	-0.0241667	0.514	1.15117	1.5975	1.95833	2.25183	2.49267	2.70333	2.89917	3.08933	3.27883	3.46917	3.67	3.87217	4.09567	4.34583	4.53817	4.72383	4.83933	4.933	5.04733	5.11983	5.14767	5.12283	5.06067	4.9995	5.21667	5.15233	4.96467	4.58133	4.49067	4.2275	4.077	4.00133	3.861	3.81733	3.80233	3.36117	3.352	3.098	2.83417	2.745
	CL-316,243-5	-0.415583	-0.256833	-0.1265	-0.0311667	0.0225	0	-0.0275	-0.06	0.178	0.671833	0.998667	1.2265	1.39217	1.51017	1.61533	1.70317	1.77433	1.83517	1.87667	1.91067	1.94633	1.98417	2.01733	2.0575	2.08283	2.0955	2.1245	2.1525	2.178	2.20417	2.20483	2.1965	2.19133	2.18367	2.18683	2.19133	2.19133	2.23417	2.2605	2.29733	2.30667	2.318	2.299	2.31483	2.30933	2.33467	2.379	2.35483
ΔTRec	Saline-1	-0.0166667	0.0275	0.0691667	0.08	0.0545	0	-0.0785	-0.1695	-0.213333	-0.184	-0.1265	-0.039	0.0685	0.187333	0.308833	0.435333	0.5435	0.637833	0.7195	0.779333	0.845	0.932333	0.969667	1.01667	1.0565	1.08567	1.10583	1.1185	1.12383	1.12367	1.12217	1.1105	1.09667	1.07267	1.05233	1.04267	1.01117	0.987167	0.944	0.892667	0.835667	0.786	0.742833	0.722667	0.709667	0.6935	0.697667	0.720167
	Saline-2	-0.0475	-0.031	0	-0.0475	-0.031	0	0.0431667	0.0463333	0.0423333	0.0408333	0.0243333	0.0085	-0.00816667	-0.0293333	-0.0278333	0	0.0583333	0.120167	0.184333	0.237833	0.285	0.335333	0.370333	0.399833	0.429333	0.461667	0.491333	0.517667	0.543	0.574	0.601667	0.631	0.676833	0.715333	0.765333	0.819167	0.9065	1.0085	1.12117	1.22533	1.30833	1.38833	1.48333	1.60683	1.67067	1.70433	1.73717	1.76233
	Saline-3	-0.148255	-0.223333	-0.103	0.0488333	0.0683333	0	-0.105833	-0.208667	-0.312333	-0.384167	-0.387833	-0.3395	-0.263833	-0.181333	-0.122	-0.0538333	-0.00916667	0.0208333	0.0583333	0.0846667	0.126167	0.157833	0.1875	0.215167	0.241167	0.2765	0.293833	0.314833	0.336667	0.356333	0.3635	0.3715	0.380667	0.390167	0.398333	0.391667	0.3895	0.389833	0.388	0.376833	0.363	0.353	0.340167	0.333833	0.315	0.288667	0.272333	0.253333
	Saline-4	0.25	0.2	0.1225	0.03	0.021	0	-0.04	-0.0976923	-0.16	-0.117333	-0.008125	0.0958824	0.178889	0.263158	0.3105	0.367143	0.391818	0.431304	0.487083	0.5524	0.624231	0.686296	0.7425	0.80931	0.866667	0.911613	0.92125	0.807273	0.736765	0.794571	1.015	1.20351	1.36105	1.50538	1.62775	1.72805	1.80714	1.89023	1.95795	1.94689	1.95326	1.9183	1.92958	1.91939	1.9004	1.85137	1.78462	1.7534
	CL-316,243-1	0.453667	0.384167	0.303	0.209833	0.109667	0	-0.1575	-0.175	0.042	0.372	0.720833	1.06367	1.37367	1.649	1.904	2.1165	2.26833	2.30517	2.501	2.707	2.86583	3.00317	3.13	3.15217	3.10367	3.15233	3.25867	3.40833	3.50117	3.433	3.33533	3.25483	3.0855	2.91217	2.73233	2.567	2.41567	2.27867	2.1505	2.08967	2.09167	2.09533	2.06433	2.01267	1.9385	1.86433	1.823	1.784
	CL-316,243-2	0.552	0.4695	0.371333	0.256	0.133333	0	-0.157667	-0.297167	-0.382167	-0.4045	-0.3895	-0.344	-0.275	-0.197667	-0.134833	-0.0618333	0.0095	0.0725	0.132	0.2285	0.3295	0.445667	0.609833	0.775833	0.933	1.08167	1.22517	1.359	1.48583	1.58767	1.66133	1.708	1.78767	1.8515	1.87367	1.8665	1.83883	1.79833	1.7545	1.7195	1.669	1.61967	1.568	1.51433	1.46183	1.4185	1.3535	1.29667
	CL-316,243-3	0.1695	0.136667	0.1165	0.0835	0.0196667	0	-0.0113333	0.0336667	0.0376667	0.104667	0.237	0.4575	0.7095	0.992667	1.30617	1.6135	1.85233	2.09083	2.20817	2.30983	2.39433	2.458	2.57233	2.68467	2.76883	2.83867	2.95367	2.95617	2.94517	2.8965	2.65483	2.70967	2.56467	2.40367	2.222	2.048	1.882	1.71317	1.54533	1.38333	1.22333	1.0945	0.9355	0.803833	0.6655	0.517667	0.358167	0.206
	CL-316,243-4	-0.256	-0.147833	-0.0808333	-0.0196667	0.0153333	0	-0.0373333	-0.0835	0.008	0.1975	0.439167	0.685	0.923667	1.13783	1.33417	1.52533	1.712	1.89517	2.0865	2.2815	2.47767	2.666	2.872	3.0505	3.21433	3.337	3.443	3.5425	3.60183	3.6045	3.58583	3.5225	3.575	3.6495	3.62667	3.44033	3.33333	3.203	3.06083	2.9495	2.83233	2.7055	2.64983	2.5235	2.36483	2.23983	2.077	1.9285
	CL-316,243-5	-0.132042	-0.0123333	0.0525	0.0646667	0.0458333	0	-0.0546667	-0.1365	-0.1985	-0.140667	0.038	0.205333	0.352667	0.4685	0.568833	0.658833	0.7305	0.790167	0.843167	0.879167	0.914333	0.9495	0.981667	1.016	1.04383	1.06567	1.086	1.1055	1.13267	1.1625	1.17817	1.17333	1.16683	1.15917	1.15533	1.15817	1.15267	1.17217	1.19283	1.21617	1.24117	1.2575	1.247	1.24533	1.25117	1.24817	1.27767	1.273
ΔTIng	Saline-1	-0.166	-0.076	-0.002	0.0458333	0.0571667	0	-0.0865	-0.178667	-0.254167	-0.335333	-0.396167	-0.440833	-0.459333	-0.4545	-0.452	-0.397333	-0.328333	-0.266	-0.204833	-0.154833	-0.115833	-0.0696667	-0.0188333	0.0125	0.045	0.083	0.115833	0.1375	0.158333	0.175833	0.192	0.195333	0.187167	0.163833	0.149833	0.127833	0.1055	0.0805	0.0553333	0.0321667	0.000666667	-0.0308333	-0.0695	-0.100333	-0.146833	-0.172667	-0.199	-0.214667
	Saline-2	0.0915	0.0295	0	0.0915	0.0295	0	-0.229667	-0.283167	-0.324	-0.358667	-0.402167	-0.419833	-0.433	-0.449667	-0.446167	-0.464	-0.4785	-0.4535	-0.425667	-0.3975	-0.362833	-0.3195	-0.287667	-0.258667	-0.221333	-0.185	-0.151333	-0.125833	-0.1025	-0.0903333	-0.0766667	-0.0576667	-0.0356667	-0.0245	0.00333333	0.0496667	0.0921667	0.117667	0.171167	0.223167	0.298667	0.365833	0.439	0.5525	0.656833	0.729833	0.807167	0.880833
	Saline-3	-0.159881	-0.219333	-0.093	0.0421667	0.0408333	0	-0.0918333	-0.206167	-0.324667	-0.450333	-0.539167	-0.601167	-0.6245	-0.642833	-0.6345	-0.6165	-0.5845	-0.558833	-0.532333	-0.483333	-0.5025	-0.4375	-0.3905	-0.348	-0.322833	-0.327167	-0.277833	-0.245833	-0.223	-0.2085	-0.200167	-0.187833	-0.1745	-0.160167	-0.153167	-0.138333	-0.125	-0.129	-0.1405	-0.1205	-0.107333	-0.110833	-0.1305	-0.113833	-0.110167	-0.115833	-0.125	-0.117
	Saline-4	0.134545	-0.155455	-0.132955	0.0212121	0.0395455	0	-0.0162879	-0.0939161	-0.180455	-0.278788	-0.29233	-0.288396	-0.32601	-0.296507	-0.226955	-0.185931	-0.155455	-0.11502	-0.0592045	-0.0298545	0.0122378	0.0952862	0.14276	0.218339	0.276879	0.297449	0.275483	0.342121	0.399251	0.52826	0.57399	0.607248	0.721124	0.811212	0.906045	0.945033	1.01669	1.11896	1.22023	1.2981	1.35868	1.39667	1.44913	1.47353	1.49295	1.47043	1.43955	1.43002
	CL-316,243-1	0.462833	0.373333	0.290167	0.1885	0.0965	0	-0.0708333	-0.1215	-0.0995	0.0133333	0.143167	0.313167	0.5055	0.710833	0.906667	1.10367	1.32233	1.923	2.20833	2.41333	2.61467	2.83183	3.01817	3.16233	3.4505	3.5795	3.71617	3.826	3.91017	3.957	3.90417	3.87633	3.7745	3.64233	3.49183	3.3425	3.19883	3.05433	2.91317	2.8115	2.752	2.7235	2.69133	2.64217	2.57967	2.519	2.44783	2.39333
	CL-316,243-2	0.576167	0.57	0.388667	0.240833	0.109167	0	-0.102667	-0.209167	-0.298167	-0.3665	-0.395833	-0.359667	-0.274833	-0.168167	-0.067	0.0436667	0.152833	0.234667	0.315833	0.419333	0.542833	0.6975	0.885667	1.07517	1.26533	1.45867	1.64383	1.80183	1.9325	2.04617	2.1215	2.22167	2.327	2.35333	2.3695	2.373	2.35517	2.3195	2.2785	2.2205	2.16233	2.10367	2.049	1.9935	1.94417	1.88933	1.83133	1.75
	CL-316,243-3	0.037	0.00483333	-0.145333	-0.116167	-0.0335	0	0.0255	-0.0528333	0.0865	0.0906667	0.117333	0.2395	0.436667	0.706667	1.02883	1.3425	1.60783	1.9255	2.08317	2.21683	2.33133	2.44083	2.52583	2.63467	2.6835	2.77933	2.86533	2.65933	2.5955	2.80383	2.72967	2.645	2.54833	2.43833	2.29033	2.1215	1.95067	1.78367	1.60217	1.445	1.27767	1.15033	0.999167	0.863167	0.735167	0.600333	0.45	0.300833
	CL-316,243-4	-0.318042	-0.177167	-0.0783333	-0.0261667	0.002	0	-0.0313333	-0.0436667	-0.0815	-0.0775	0.019	0.141667	0.293	0.466833	0.640333	0.8075	0.967	1.12617	1.28383	1.43917	1.59317	1.82867	2.02933	2.22633	2.39883	2.534	2.6255	2.706	2.7905	2.867	2.91617	2.98233	2.99317	3.03667	3.0415	3.02067	2.9555	2.81533	2.69017	2.5565	2.4325	2.3315	2.2695	2.07567	1.89333	1.782	1.6535	1.49117
	CL-316,243-5	-1.37867	-1.37867	-1.37867	-1.37867	-1.37867	0	-0.382833	-0.576333	-0.746	-0.656333	-0.415667	-0.264	-0.215167	-0.169833	-0.0703333	-0.041	-0.0426667	0.0281667	0.005	0.120833	0.0815	0.196667	0.166667	0.236167	0.26	0.103167	0.104167	0.208833	0.257833	0.207667	0.212333	0.238	0.189333	0.2015	0.118167	0.145833	0.0895	0.117833	0.0181667	-0.0158333	0.0401667	0.103667	0.1445	0.0746667	0.132667	0.1145	0.0815	0.104333
[truncated: 18 more columns]

## Sheet: Fig2E
	Total heat production (Δ˚C×min)	TMax following PGE2 ICV (˚C)	Velocity 5min (˚C min-1)
TN-acclimated-1	91.2363	37.89	0.172648
TN-acclimated-2	121.899	39.15	0.2643
TN-acclimated-3	113.734	37.67	0.0559667
TN-acclimated-4	97.4948	37.86	0.121943
TN-acclimated-5	64.2569	37.21	0.022719
Cold-acclimated-1	134.864	40.29	0.223995
Cold-acclimated-2	134.118	40.67	0.232333
Cold-acclimated-3	125.038	38.01	0.321638
Cold-acclimated-4	162.964	41.33	0.376467
Cold-acclimated-5	104.824	39.38	0.179238
Saline-1	110.449	38.38	0.166519
Saline-2	55.9342	38.41	0.00354286
Saline-3	76.2297	37.91	0.125538
Saline-4	68.1145	38.82	0.00187694
CL-316,243-1	206.612	41.2137	0.518076
CL-316,243-2	137.985	39.8193	0.221848
CL-316,243-3	99.725	40.576	0.250948
CL-316,243-4	197.272	40.988	0.436967
CL-316,243-5	109.614	38.1858	0.20941
