# Supplementary material for: Metabolic flexibility via mitochondrial BCAA carrier SLC25A44 is required for optimal fever
Source: eLife. 2021 May 4;10:e66865. doi: 10.7554/eLife.66865 (PMC8137140; doi:10.7554/eLife.66865)
Supplement: Figure 3—figure supplement 1—source data 1. [file elife-66865-fig3-figsupp1-data1.xlsx]

## Sheet: Fig3S1C
	Body weight (g)
Control-1	25.1
Control-2	26.2
Control-3	28.4
Control-4	23.2
MBCUCP1-KO-1	26.4
MBCUCP1-KO-2	25.8
MBCUCP1-KO-3	27.7
MBCUCP1-KO-4	20.6
MBCUCP1-KO-5	21.9
