# Supplementary material for: Metabolic flexibility via mitochondrial BCAA carrier SLC25A44 is required for optimal fever
Source: eLife. 2021 May 4;10:e66865. doi: 10.7554/eLife.66865 (PMC8137140; doi:10.7554/eLife.66865)
Supplement: Figure 3—source data 1. [file elife-66865-fig3-data1.xlsx]

## Sheet: Fig3B
	Relative Slc25a44 mRNA
	BAT	Gastrocnemius	Liver
Control-1	0.691151	0.52612	1.11646
Control-2	0.999532	1.85871	1.19383
Control-3	1.30932	0.61517	0.689711
MBCUCP1-KO-1	0.017112	0.452285	0.744661
MBCUCP1-KO-2	0.0672361	0.935234	1.31725
MBCUCP1-KO-3	0.0115444	2.06624	0.828431

## Sheet: Fig3C
	BAT (mg)	Ing-WAT (mg)	Epi-WAT (mg)	Liver (mg)	Muscle (mg)
Control-1	90	250	280	960	300
Control-2	80	220	360	1080	280
Control-3	110	360	190	790	260
Control-4	80	180	240	850	280
MBCUCP1-KO-1	90	320	290	1030	320
MBCUCP1-KO-2	80	290	360	930	280
MBCUCP1-KO-3	80	280	420	1040	300
MBCUCP1-KO-4	70	180	280	950	240
MBCUCP1-KO-5	80	260	290	970	260

## Sheet: Fig3E
	Relative [1-14C] Val oxidation (cpm mg-1)
	BAT	Muscle
Control-1	0.975048	0.452087
Control-2	0.813896	0.432515
Control-3	0.98246	0.319616
Control-4	1.2286	0.288687
MBCUCP1-KO-1	0.406473	0.190983
MBCUCP1-KO-2	0.232999	0.20363
MBCUCP1-KO-3	0.272438	0.532986
MBCUCP1-KO-4	0.209003	0.229795
MBCUCP1-KO-5	0.408111	0.514311

## Sheet: Fig3F,G
		Time after ICV injection of PGE2 (min)
		-5	-4	-3	-2	-1	0	1	2	3	4	5	6	7	8	9	10	11	12	13	14	15	16	17	18	19	20	21	22	23	24	25	26	27	28	29	30	31	32	33	34	35	36	37	38	39	40	41	42
ΔTBAT	Control-1	0.458083	0.455	0.353	0.209167	0.115333	0	-0.03	0.325333	0.867833	1.29717	1.65533	1.88083	2.02817	2.147	2.31533	2.53267	2.7255	2.8945	3.04517	3.14167	3.19233	3.27383	3.722	3.82483	3.84867	3.8485	3.84833	3.84217	3.91267	4.05067	3.97317	3.84717	3.64817	3.472	3.30433	3.17367	3.01267	2.8035	2.4875	2.239	1.97117	1.74333	1.5445	1.39667	1.23617	1.07167	0.920167	0.769167
	Control-2	0.00425	0.0533333	0.0823333	0.08	0.0403333	0	0.4875	1.18617	1.69933	2.09617	2.43917	2.71667	2.92683	3.09033	3.23183	3.37333	3.4985	3.609	3.70933	3.8015	3.883	3.96133	4.01383	4.0395	4.04283	4.04133	4.03917	4.033	4.009	3.97633	3.92533	3.87717	3.828	3.82117	3.74267	3.5755	3.39183	3.15933	3.01283	2.90317	2.79117	2.65	2.50867	2.29783	2.15967	2.26983	2.23717	2.09967
	Control-3	0.359667	0.341833	0.287667	0.2125	0.117167	0	-0.1055	-0.225833	-0.307167	-0.366167	-0.111333	0.3095	0.732667	1.24383	1.5585	1.7725	1.91467	2.01767	2.10517	2.18417	2.26267	2.348	2.45467	2.53067	2.57567	2.6015	2.62633	2.64167	2.649	2.64367	2.686	2.795	2.92217	2.921	2.84833	2.77383	2.78883	2.7525	2.69167	2.50883	2.354	2.38533	2.05333	1.65617	1.33833	1.06983	0.817833	0.596333
	Control-4	0.0656667	0.240667	0.2105	0.107833	0.0491667	0	-0.0105	0.230667	0.344667	0.429167	0.550833	0.655	0.7535	0.833667	0.8975	0.9905	1.09217	1.1845	1.24767	1.29917	1.3575	1.42683	1.4785	1.53967	1.5845	1.57433	1.5065	1.53267	1.56317	1.5935	1.61383	1.61483	1.60333	1.6055	1.61767	1.62717	1.63883	1.6475	1.64867	1.63117	1.62083	1.61867	1.641	1.782	1.865	1.92683	1.96383	1.97917
	Control-5	0.3215	0.292667	0.2395	0.1645	0.0901667	0	-0.0736667	-0.077	0.0473333	0.2835	0.455	0.688	0.907	1.0985	1.25333	1.37717	1.48683	1.60267	1.71417	1.81783	1.91667	2.018	2.0985	2.1585	2.20167	2.23167	2.26517	2.273	2.26867	2.25217	2.2275	2.19583	2.13083	2.072	2.03033	1.95067	1.97667	1.84833	1.7545	1.71367	1.60267	1.68533	1.63083	1.60883	1.5435	1.5635	1.44983	1.25767
	Control-6	-0.461	-0.406	-0.357	-0.203333	-0.0993333	0	0.0508333	0.456	0.85	1.17417	1.45633	1.70233	1.91317	2.10767	2.29133	2.4635	2.63967	2.71983	2.8785	3.02733	3.14233	3.22283	3.1825	2.93467	2.601	2.36017	2.17033	1.95667	1.74683	1.57667	1.385	1.197	1.05917	0.953167	0.759333	0.595667	0.442667	0.344833	0.144833	-0.019	-0.18	-0.353667	-0.283167	-0.405	-0.749833	-0.995833	-1.11917	-1.20667
	Control-7	-0.136667	-0.0396667	0.00866667	0.027	0.0241667	0	-0.00816667	0.578333	1.04017	1.2635	1.48367	1.699	1.78033	1.87367	1.9965	2.10483	2.18	2.24067	2.3025	2.31467	2.32717	2.32517	2.30667	2.27067	2.23133	2.19883	2.107	1.985	1.91017	1.83383	1.6805	1.57533	1.43533	1.339	1.17733	1.15183	1.446	1.4915	1.46533	1.34567	1.27017	1.08217	1.052	0.976667	0.916167	0.6125	0.412333	0.592
	MBCUCP1-KO-1	0.177708	0.166167	0.1505	0.1185	0.0711667	0	-0.0786667	0.181833	0.5455	0.679167	0.774	0.8085	0.819333	0.820167	0.821833	0.848667	0.892	0.935167	0.9455	0.948333	0.969667	0.985667	0.929667	1.0025	0.976833	1.01283	1.0235	1.05517	1.04317	1.02	0.992833	0.9725	0.9505	0.9115	0.883	0.927167	0.949667	0.8875	0.745	0.670167	0.538667	0.502333	0.5115	0.429333	0.298833	0.215	0.110333	-0.0516667
	MBCUCP1-KO-2	0.123333	0.0783333	0.0168333	-0.013	-0.0336667	0	0.4865	1.69317	2.37633	2.812	3.09267	2.8875	2.592	1.97983	2.0995	2.61367	2.32583	1.89333	1.97533	1.91183	2.1455	1.95717	2.0825	1.24	1.23467	1.3485	1.35683	1.3375	1.25983	1.24033	1.26283	1.24733	1.15983	1.09733	1.03333	0.955667	0.880167	0.7925	0.672333	0.539	0.431667	0.340833	0.177	0.118167	0.014	-0.0981667	-0.2075	-0.331
	MBCUCP1-KO-3	0.158958	0.1995	0.199667	0.160333	0.0926667	0	-0.109167	-0.133333	0.122	0.334833	0.503833	0.613	0.685333	0.729	0.765167	0.787333	0.811667	0.844333	0.883833	0.906	0.931	0.943333	0.956333	0.929167	0.9925	0.868667	0.780667	0.789167	0.801333	0.812167	0.828333	0.8365	0.839333	0.853333	0.855333	0.833667	0.804333	0.756167	0.785333	0.445	0.0145	-0.314333	-0.599833	-0.8575	-1.0945	-1.30917	-1.50583	-1.68467
	MBCUCP1-KO-4	0.177667	0.1815	0.161333	0.113	0.056	0	-0.0428333	0.146333	0.344	0.475333	0.5615	0.699	0.895833	1.014	1.05467	1.08983	1.108	1.14633	1.161	1.18233	1.20183	1.24183	1.2375	1.22383	1.18867	1.20383	1.22583	1.18583	1.161	1.18717	1.17133	1.132	1.10117	1.14933	1.21767	1.2755	1.31783	1.351	1.41033	1.46617	1.4945	1.52333	1.53633	1.56233	1.4675	1.29217	1.28367	1.28817
	MBCUCP1-KO-5	-0.0426667	-0.00266667	0.031	0.0675	0.0565	0	-0.0761667	-0.132667	0.00416667	0.255	0.524333	0.7285	0.864833	0.9365	0.953	0.938333	0.929333	0.925	0.918167	0.915167	0.893	0.855167	0.806167	0.755	0.706167	0.637667	0.635333	0.588	0.542667	0.485833	0.414667	0.3295	0.251	0.1815	0.0878333	0.02	-0.00416667	-0.0681667	-0.13	-0.177667	-0.232833	-0.2935	-0.308167	-0.3585	-0.368333	-0.402833	-0.4265	-0.446833
	MBCUCP1-KO-6	0.202333	0.257333	0.2675	0.214	0.1215	0	-0.1635	-0.317333	-0.383833	-0.1335	0.1805	0.483167	0.694	0.799333	0.864	0.979833	1.05833	1.14183	1.2295	1.29617	1.348	1.407	1.49333	1.54533	1.58033	1.58933	1.5935	1.58283	1.54383	1.55233	1.57317	1.542	1.49283	1.4385	1.4185	1.37	1.31633	1.2445	1.1645	1.10617	1.04883	0.9065	0.8395	0.714833	0.6865	0.532167	0.502833	0.4065
	MBCUCP1-KO-7	-0.0978333	-0.0665	-0.053	-0.093	-0.0285	0	0.0403333	0.114333	0.366667	0.702	0.865167	1.1625	1.39167	1.57417	1.732	1.875	2.00417	2.12467	2.23783	2.339	2.43433	2.52267	2.60933	2.64383	2.6085	2.58483	2.3675	2.03017	1.72533	1.4635	1.283	1.11133	0.9825	0.937833	1.01267	0.844	0.602333	0.443167	0.333	0.406167	0.334833	0.114833	-0.121333	-0.344333	-0.2435	-0.226333	-0.333333	-0.540167
ΔTRec	Control-1	0.440417	0.522833	0.491667	0.325667	0.162	0	-0.143667	-0.152167	0.0701667	0.335667	0.5865	0.808	0.9865	1.12833	1.27383	1.44183	1.6015	1.7545	1.9005	2.04117	2.15883	2.25483	2.395	2.52	2.5815	2.61033	2.63283	2.6555	2.66233	2.78267	2.80583	2.76517	2.62383	2.47833	2.33833	2.21783	2.0965	1.96183	1.77133	1.57717	1.37817	1.17517	0.990833	0.819333	0.6495	0.482833	0.320833	0.167333
	Control-2	0.109875	0.161667	0.181	0.156667	0.0918333	0	-0.0291667	0.2065	0.5895	0.952167	1.2785	1.56467	1.79933	1.99067	2.1485	2.29417	2.43533	2.55717	2.66067	2.754	2.83617	2.9105	2.967	3.00067	3.01833	3.01833	3.01417	3.01367	2.994	2.9725	2.93317	2.892	2.85117	2.83733	2.8055	2.68867	2.55133	2.38117	2.2305	2.10967	1.989	1.86083	1.73367	1.58283	1.41317	1.38083	1.33317	1.24367
	Control-3	0.484	0.444833	0.359833	0.252667	0.123	0	-0.118167	-0.258333	-0.3995	-0.527833	-0.569833	-0.379667	-0.0906667	0.240667	0.508833	0.715333	0.8615	0.964833	1.04817	1.11967	1.1905	1.26367	1.35567	1.42567	1.47617	1.50533	1.53283	1.5445	1.55867	1.5565	1.55283	1.59617	1.68933	1.71017	1.66683	1.62267	1.60583	1.596	1.55917	1.486	1.36583	1.33783	1.2165	1.01617	0.815333	0.621333	0.433	0.247167
	Control-4	0.202333	0.251	0.2295	0.151667	0.0883333	0	-0.0976667	-0.0955	-0.0508333	0.026	0.1235	0.200667	0.295333	0.382	0.4525	0.528167	0.6185	0.706833	0.781833	0.834333	0.885167	0.946833	0.9985	1.055	1.10917	1.13217	1.09517	1.09017	1.11117	1.1415	1.16667	1.18033	1.17483	1.17933	1.189	1.19933	1.204	1.213	1.21833	1.21483	1.20117	1.194	1.18683	1.20517	1.25933	1.30567	1.36617	1.39433
	Control-5	0.400833	0.3495	0.283167	0.195167	0.102833	0	-0.109167	-0.228167	-0.3085	-0.310333	-0.247667	-0.0968333	0.0848333	0.265	0.4235	0.559833	0.672	0.7835	0.8955	0.9945	1.09117	1.18833	1.27317	1.33833	1.391	1.42733	1.46183	1.4825	1.48917	1.48683	1.473	1.457	1.42183	1.38	1.3425	1.29317	1.28133	1.2275	1.16283	1.106	1.03833	1.01017	0.983167	0.947167	0.902333	0.879	0.829667	0.744667
	Control-6	0.1115	0.1355	0.1155	0.0651667	0.0308333	0	-0.0305	0.00183333	0.189667	0.467	0.737	0.985	1.20817	1.41183	1.60083	1.776	1.94717	2.1125	2.268	2.4135	2.54067	2.637	2.55633	2.4645	2.27667	2.08717	1.92583	1.77283	1.61833	1.4675	1.31683	1.16983	1.0255	0.886667	0.749333	0.608333	0.473833	0.336	0.202667	0.0613333	-0.0778333	-0.223167	-0.353333	-0.4655	-0.597333	-0.742833	-0.888667	-1.02017
	Control-7	0.0668333	0.130833	0.1375	0.102833	0.0585	0	-0.0831667	-0.160833	-0.103333	0.0206667	0.170667	0.334167	0.491333	0.6435	0.772667	0.886	0.983	1.06	1.12167	1.16367	1.18583	1.1965	1.1945	1.1745	1.15067	1.12483	1.07783	1.00467	0.916333	0.856667	0.762667	0.664833	0.559833	0.4635	0.3555	0.24	0.263667	0.279	0.272	0.218167	0.157833	0.0691667	-0.018	-0.0905	-0.159333	-0.262167	-0.393	-0.452667
	MBCUCP1-KO-1	0.3415	0.344833	0.336333	0.273	0.152	0	-0.147333	-0.2835	-0.315167	-0.296667	-0.267	-0.249667	-0.248333	-0.2485	-0.258	-0.258333	-0.252	-0.232333	-0.229	-0.229	-0.226333	-0.217167	-0.243	-0.2385	-0.233833	-0.215833	-0.209	-0.200333	-0.204333	-0.219667	-0.241	-0.257833	-0.275833	-0.310167	-0.352833	-0.343833	-0.324667	-0.353	-0.4185	-0.489167	-0.572667	-0.644667	-0.681667	-0.728167	-0.813833	-0.894167	-0.967667	-1.09883
	MBCUCP1-KO-2	-0.180833	-0.143167	-0.107667	-0.0698333	-0.0303333	0	0.0828333	0.374333	0.75	1.06083	1.30217	1.47433	1.59933	1.6885	1.78433	1.8815	1.99633	2.092	2.16967	2.22233	2.26933	2.30567	2.28967	2.30517	2.3545	2.3655	2.33667	2.29183	2.23517	2.173	2.11583	2.05983	1.9635	1.85733	1.76167	1.64817	1.5395	1.424	1.2925	1.17117	1.04833	0.905167	0.751167	0.635667	0.518333	0.401333	0.286333	0.160667
	MBCUCP1-KO-3	0.473042	0.428667	0.348667	0.252	0.134333	0	-0.1435	-0.294833	-0.432833	-0.477667	-0.431333	-0.373	-0.318	-0.281167	-0.253833	-0.234833	-0.2185	-0.202667	-0.183167	-0.161167	-0.141167	-0.129667	-0.118833	-0.108	-0.102333	-0.109667	-0.0991667	-0.0836667	-0.0673333	-0.0575	-0.053	-0.0448333	-0.0411667	-0.0408333	-0.0435	-0.043	-0.0605	-0.103833	-0.268833	-0.459333	-0.665833	-0.8735	-1.08267	-1.287	-1.48833	-1.68867	-1.88467	-2.07317
	MBCUCP1-KO-4	0.352667	0.307	0.2435	0.170667	0.091	0	-0.0955	-0.179	-0.236	-0.270333	-0.292167	-0.303	-0.268667	-0.2165	-0.175167	-0.146	-0.1255	-0.105	-0.089	-0.0788333	-0.0696667	-0.0523333	-0.0428333	-0.0385	-0.053	-0.0591667	-0.0588333	-0.0738333	-0.0926667	-0.102	-0.0991667	-0.115	-0.148667	-0.1665	-0.167167	-0.154667	-0.139	-0.115167	-0.0635	-0.0481667	-0.0176667	0.00866667	0.0373333	0.0525	0.0606667	0.0761667	0.0886667	0.0923333
	MBCUCP1-KO-5	0.0533333	0.0986667	0.134667	0.138833	0.0851667	0	-0.103667	-0.208667	-0.302	-0.308333	-0.193167	-0.0498333	0.0745	0.157167	0.199333	0.205167	0.1975	0.183667	0.172333	0.162167	0.1435	0.107333	0.0658333	0.0145	-0.0351667	-0.0965	-0.129	-0.165	-0.216667	-0.269667	-0.329333	-0.406667	-0.486	-0.554667	-0.6375	-0.712333	-0.762833	-0.817833	-0.884333	-0.935667	-0.993833	-1.05533	-1.0905	-1.13533	-1.1685	-1.1935	-1.22683	-1.249
	MBCUCP1-KO-6	0.261667	0.320833	0.3085	0.238667	0.1345	0	-0.148667	-0.321167	-0.517667	-0.604833	-0.538667	-0.364667	-0.179333	-0.0478333	0.0273333	0.132667	0.224333	0.304667	0.385	0.456833	0.511	0.560667	0.641667	0.697333	0.739167	0.758167	0.766833	0.758333	0.735333	0.720333	0.744667	0.729	0.689667	0.643167	0.612333	0.5715	0.526167	0.4625	0.390667	0.321667	0.2695	0.176167	0.0885	-0.0173333	-0.0816667	-0.185667	-0.267833	-0.333833
	MBCUCP1-KO-7	-0.310167	-0.241333	-0.174	-0.117833	-0.0576667	0	0.0118333	-0.0143333	-0.0273333	0.027	0.11	0.287	0.481667	0.658833	0.8145	0.950833	1.0785	1.19517	1.30617	1.41483	1.50667	1.5955	1.68	1.75533	1.7655	1.71283	1.6825	1.53567	1.34333	1.14733	0.969167	0.805833	0.6585	0.528167	0.475167	0.388667	0.255167	0.108167	-0.0346667	-0.113333	-0.182167	-0.2935	-0.436167	-0.600667	-0.7075	-0.761833	-0.8345	-0.9535
ΔTIng	Control-1	0.465875	0.5995	0.560667	0.416167	0.189333	0	-0.145667	-0.286333	-0.283833	-0.224333	-0.113333	0.0055	0.147833	0.295833	0.438333	0.593833	0.771667	0.934	1.09533	1.17283	1.314	1.4175	1.52017	1.67	1.784	1.88433	1.93333	2.00633	2.03567	2.0665	1.9955	1.99	2.043	2.05733	1.98317	1.96867	1.825	1.7335	1.61217	1.439	1.30633	1.14033	0.9375	0.804833	0.646167	0.532333	0.422167	0.283833
	Control-2	0.204333	0.257167	0.323667	0.327333	0.212	0	-0.115833	-0.479	-0.644	-0.541	-0.333333	-0.135833	0.044	0.217	0.425167	0.575833	0.700667	0.858667	0.955	1.09283	1.19967	1.27717	1.37017	1.4125	1.48717	1.494	1.54833	1.565	1.5615	1.59533	1.56733	1.56533	1.53183	1.46317	1.39183	1.34783	1.29467	1.22533	1.13167	1.02767	0.900833	0.807	0.7225	0.578333	0.4535	0.334167	0.259333	0.184333
	Control-3	0.482	0.450333	0.375833	0.266	0.135	0	-0.138333	-0.287667	-0.4215	-0.567167	-0.6225	-0.513333	-0.35	-0.1305	0.0455	0.180167	0.2915	0.382	0.454	0.515833	0.555333	0.5955	0.6315	0.674833	0.718833	0.745833	0.766833	0.7875	0.801333	0.808333	0.735833	0.779333	0.843333	0.894667	0.933667	0.898833	0.935167	0.935667	0.92	0.856167	0.756	0.790167	0.721833	0.661167	0.538	0.384833	0.229333	0.0751667
	Control-4	0.526333	0.437	0.341	0.235167	0.1135	0	0.0258333	-0.00633333	-0.0485	-0.0651667	-0.0665	-0.0493333	-0.0195	0.0298333	0.0883333	0.178333	0.2615	0.344833	0.408	0.467	0.526333	0.586333	0.647667	0.713	0.750167	0.777333	0.783833	0.779833	0.785667	0.802833	0.822	0.832	0.832833	0.836	0.845	0.851833	0.852833	0.855833	0.859833	0.837	0.841	0.841167	0.838667	0.847667	0.860667	0.886667	0.930333	0.972833
	Control-5	0.509167	0.4265	0.315833	0.253667	0.147167	0	-0.00316667	-0.158833	-0.271	-0.373333	-0.322333	-0.302	-0.253667	-0.197167	-0.0966667	-0.0358333	0.111167	0.239333	0.285167	0.421333	0.487833	0.551	0.654833	0.736	0.7755	0.863833	0.888833	0.945167	0.973667	0.966167	0.999167	1.00367	1.02433	0.967667	0.957	0.9155	0.848333	0.867667	0.8405	0.775333	0.722	0.619333	0.571833	0.544833	0.571167	0.525833	0.543	0.539333
	Control-6	-0.0696667	0.0131667	0.0261667	0.0326667	0.046	0	-0.05	-0.1575	-0.1645	-0.1065	-0.07	0.0203333	0.160833	0.319333	0.492167	0.657667	0.857167	0.927833	1.06367	1.23	1.349	1.46417	1.58667	1.638	1.67483	1.6555	1.65817	1.57233	1.475	1.33117	1.21717	1.08467	0.952333	0.853667	0.723667	0.603167	0.465667	0.362833	0.233333	0.115833	-0.013	-0.142	-0.280833	-0.396	-0.4785	-0.571167	-0.687833	-0.793333
	Control-7	0.194	0.290167	0.301833	0.297	0.2115	0	-0.0351667	-0.1195	-0.0888333	-0.132167	-0.181667	-0.111	0.0291667	0.072	0.132667	0.219	0.291667	0.396667	0.389167	0.507	0.539333	0.538167	0.593833	0.588167	0.561167	0.547	0.544	0.535833	0.456	0.4415	0.407167	0.338833	0.283333	0.220167	0.0928333	0.0281667	-0.0383333	-0.0676667	-0.00833333	-0.0306667	-0.081	-0.1225	-0.145	-0.202	-0.279167	-0.346667	-0.440667	-0.4395
	MBCUCP1-KO-1	0.103375	0.115667	0.128167	0.133167	0.0881667	0	-0.104	-0.253	-0.3765	-0.422167	-0.4215	-0.420333	-0.431	-0.444667	-0.462	-0.480833	-0.499167	-0.519333	-0.529667	-0.53	-0.529833	-0.540167	-0.550167	-0.563	-0.572	-0.5785	-0.583167	-0.574667	-0.569333	-0.575167	-0.569167	-0.545167	-0.5795	-0.602833	-0.648	-0.679833	-0.683333	-0.694333	-0.707667	-0.736	-0.777333	-0.812833	-0.8775	-0.922333	-0.9845	-1.04817	-1.09867	-1.183
	MBCUCP1-KO-2	-0.158333	-0.147667	-0.1285	-0.0748333	-0.0326667	0	0.0398333	0.1425	0.2525	0.355	0.452167	0.5195	0.63	0.761	0.844667	0.901833	0.976833	1.05	1.12233	1.18683	1.29067	1.32233	1.34417	1.3875	1.414	1.42583	1.42067	1.3945	1.41467	1.39467	1.324	1.2725	1.24717	1.15767	1.09017	0.9995	0.907167	0.812167	0.713667	0.6	0.486833	0.374833	0.284833	0.155333	0.0273333	-0.0905	-0.209167	-0.330833
	MBCUCP1-KO-3	0.545542	0.5065	0.415	0.2985	0.164667	0	-0.1395	-0.284333	-0.4305	-0.558333	-0.6625	-0.735833	-0.7855	-0.8195	-0.853167	-0.871167	-0.895333	-0.914333	-0.926833	-0.923167	-0.920667	-0.928	-0.940833	-0.9605	-0.941167	-0.9285	-0.892	-0.847333	-0.835667	-0.854	-0.865	-0.854833	-0.852167	-0.833833	-0.8645	-0.834833	-0.839167	-0.87	-0.908167	-1.00483	-1.12083	-1.27983	-1.41217	-1.57283	-1.73583	-1.9015	-2.07533	-2.246
	MBCUCP1-KO-4	0.314333	0.2475	0.2075	0.117833	0.0683333	0	-0.0858333	-0.203667	-0.295667	-0.326	-0.4175	-0.4905	-0.508667	-0.504833	-0.503833	-0.4925	-0.489333	-0.493333	-0.512667	-0.4915	-0.485667	-0.521667	-0.535833	-0.509167	-0.567667	-0.589667	-0.601	-0.614167	-0.6365	-0.666167	-0.692	-0.717667	-0.7465	-0.782833	-0.808833	-0.796333	-0.795833	-0.762167	-0.689667	-0.700167	-0.7125	-0.683833	-0.693333	-0.663833	-0.581167	-0.548833	-0.421	-0.379167
	MBCUCP1-KO-5	-0.0276667	-0.0776667	0.019	0.0496667	0.021	0	-0.1815	-0.339667	-0.316833	-0.319333	-0.430667	-0.465167	-0.472667	-0.4165	-0.413333	-0.441667	-0.318167	-0.230833	-0.274833	-0.393333	-0.3855	-0.4335	-0.403333	-0.468167	-0.468167	-0.522	-0.539167	-0.65	-0.752	-0.908333	-0.834833	-0.7985	-0.891	-1.0225	-0.981	-1.22817	-1.192	-1.31183	-1.49383	-1.30667	-1.44	-1.4535	-1.48383	-1.64417	-1.6545	-1.77533	-1.80417	-1.792
	MBCUCP1-KO-6	0.276833	0.329167	0.338333	0.326833	0.1925	0	-0.311167	-0.501167	-0.689	-0.777667	-0.846667	-1.022	-0.967333	-0.98	-0.911667	-0.895167	-0.820833	-0.761167	-0.736167	-0.699333	-0.662667	-0.615	-0.612	-0.542	-0.490333	-0.460167	-0.461667	-0.445333	-0.507167	-0.510833	-0.4905	-0.487833	-0.464	-0.506167	-0.5475	-0.579167	-0.6125	-0.644833	-0.724167	-0.769833	-0.822833	-0.912333	-0.938167	-0.996	-1.05383	-1.11017	-1.23	-1.29467
	MBCUCP1-KO-7	-0.567333	-0.450167	-0.319333	-0.188333	-0.0768333	0	-0.0325	-0.152333	-0.303	-0.433833	-0.509333	-0.537	-0.486167	-0.416667	-0.3225	-0.236667	-0.154167	-0.0601667	0.0211667	0.0926667	0.156167	0.199	0.2385	0.320833	0.0615	-0.287	0.0231667	0.201333	0.2535	0.226333	0.138333	0.0215	-0.091	-0.2575	-0.391	-0.476167	-0.577833	-0.685333	-0.798167	-0.9085	-1.0095	-1.10683	-1.21367	-1.328	-1.453	-1.57333	-1.659	-1.7375
[truncated: 18 more columns]

## Sheet: Fig3H,I,J
	Total heat production (Δ˚C×min)	TMax following PGE2 ICV (˚C)	Velocity 5min (˚C min-1)
Control-1	108.499	39.9538	0.365733
Control-2	147.059	40.319	0.501
Control-3	79.7003	39.2578	-0.0405714
Control-4	95.4657	39.349	0.119633
Control-5	75.1432	38.6978	0.0991667
Control-6	57.5063	39.843	0.31559
Control-7	66.3818	38.3488	0.334148
MBCUCP1-KO-1	31.5348	36.996	0.185919
MBCUCP1-KO-2	56.6643	38.6318	0.660657
MBCUCP1-KO-3	24.6425	37.1575	0.117329
MBCUCP1-KO-4	49.805	37.6963	0.130276
MBCUCP1-KO-5	17.0818	37.2392	0.1072
MBCUCP1-KO-6	43.6448	37.9152	0.0264571
MBCUCP1-KO-7	49.9252	38.9885	0.187519
