# Supplementary material for: Metabolic flexibility via mitochondrial BCAA carrier SLC25A44 is required for optimal fever
Source: eLife. 2021 May 4;10:e66865. doi: 10.7554/eLife.66865 (PMC8137140; doi:10.7554/eLife.66865)
Supplement: Figure 4—source data 1. [file elife-66865-fig4-data1.xlsx]

## Sheet: Fig4A
		Time after ICV injection of PGE2 (min)
		-5	-4	-3	-2	-1	0	1	2	3	4	5	6	7	8	9	10	11	12	13	14	15	16	17	18	19	20	21	22	23	24	25	26	27	28	29	30	31	32	33	34	35	36	37	38	39	40	41	42
ΔTBAT	Control-1	0.386042	0.316667	0.240667	0.163833	0.088	0	-0.056	0.225167	0.564167	0.7315	0.931667	1.10933	1.05267	1.05367	1.22483	1.16783	1.13783	1.15517	1.251	1.33883	1.29917	1.34083	1.397	1.38833	1.3435	1.38933	1.462	1.4845	1.564	1.61167	1.63033	1.661	1.67983	1.6395	1.632	1.6235	1.62767	1.6305	1.63767	1.61083	1.58533	1.54017	1.54083	1.58033	1.67967	1.74183	1.72417	1.668
	Control-2	0.190458	0.1845	0.157667	0.121167	0.0668333	0	-0.0563333	0.160333	0.634167	0.872667	1.02183	1.10117	1.12817	1.11433	1.0505	0.941833	0.863167	0.749833	0.6505	0.501167	0.319333	0.193333	0.211333	0.544	0.979833	1.22217	1.41583	1.5695	1.57517	1.569	1.57117	1.54	1.51383	1.52717	1.42017	1.34417	1.1985	1.06567	1.01283	1.0905	0.9005	0.730167	0.593	0.468333	0.3495	0.2295	0.119833	0.015
	Control-3	0.17	0.125	0.1	0.075	0.044	0	-0.0242857	0	0.0722222	0.17	0.274545	0.38	0.483846	0.719286	0.934667	1.13188	1.31294	1.47944	1.63211	1.7705	1.8919	2.00136	2.0987	2.18375	2.25	2.31192	2.35926	2.39607	2.42276	2.44067	2.45419	2.46125	2.46121	2.455	2.44571	2.43083	2.41351	2.39474	2.38359	2.3665	2.34512	2.32333	2.30047	2.27727	2.252	2.22696	2.20149	2.17646
	Control-4	0.310364	0.297	0.297	0.264167	0.378167	0	-0.101	1.20017	1.74483	2.33817	2.6835	2.925	3.08483	3.17667	3.24117	3.27883	3.293	3.28233	3.24867	3.20983	3.16283	3.11883	3.07133	3.00783	2.99217	2.98417	2.96233	2.89133	2.83683	2.78533	2.768	2.74417	2.726	2.67033	2.60733	2.56867	2.532	2.5045	2.44867	2.3975	2.36717	2.36783	2.3545	2.31083	2.24417	2.24067	2.23067	2.17433
	Control-5	0.545	0.448	0.333833	0.211	0.0945	0	0.037	0.318167	0.519333	0.727833	0.878333	0.921	0.927667	1.08767	1.18683	1.198	1.22867	1.26333	1.29833	1.253	1.26867	1.26033	1.24267	1.21883	1.196	1.24367	1.20883	1.1885	1.13517	0.9145	0.972167	0.968833	0.9755	0.983333	1.001	0.9995	1.00817	1.01267	1.00483	0.978333	0.9555	0.944	0.800833	0.583667	0.4285	0.199667	-0.004	0.0805
	BCKDHAUCP1-KO-1	-0.441	-0.452833	-0.306833	-0.195333	-0.1015	0	0.0926667	0.198667	0.302333	0.438333	0.636833	0.8025	0.896333	0.911667	0.8705	0.805167	0.735833	0.6715	0.752	0.8465	0.8555	0.857333	0.865	0.817667	0.7575	0.698833	0.648833	0.598833	0.553	0.507333	0.4575	0.412333	0.365167	0.314667	0.263667	0.2185	0.163167	0.106333	0.0538333	-0.00166667	-0.0573333	-0.129667	-0.1875	-0.242667	-0.300833	-0.353333	-0.4025	-0.453833
	BCKDHAUCP1-KO-2	0.0765417	0.0983333	0.103833	0.0911667	0.0776667	0	-0.04	0.082	0.334833	0.476833	0.6105	0.6415	0.689833	0.632	0.539667	0.455667	0.376667	0.272333	0.203667	0.1325	0.0496667	-0.0275	-0.0953333	-0.163833	-0.228667	-0.291333	-0.350167	-0.4105	-0.471	-0.529667	-0.5835	-0.6425	-0.703833	-0.759833	-0.8135	-0.8705	-0.9295	-0.982167	-1.03767	-1.09317	-1.15183	-1.212	-1.27017	-1.32817	-1.388	-1.44683	-1.5005	-1.5545
	BCKDHAUCP1-KO-3	-0.163167	-0.101833	-0.044	-0.0125	0.00133333	0	-0.0256667	-0.0445	-0.0406667	0.0891667	0.160667	0.2135	0.2615	0.2545	0.116167	0.000833333	-0.0995	-0.193833	-0.279333	-0.362833	-0.4785	-0.429833	-0.308	-0.337833	-0.408	-0.4685	-0.539833	-0.6195	-0.6755	-0.772333	-1.04983	-0.957167	-1.0295	-1.09567	-1.157	-1.224	-1.54983	-1.32367	-1.39867	-1.479	-1.48033	-1.38667	-1.26217	-1.16283	-1.08967	-1.0285	-0.974	-0.909833
	BCKDHAUCP1-KO-4	-0.190917	-0.123167	-0.0605	-0.0165	0.00166667	0	0.0385	0.0633333	0.264333	0.689833	1.02533	1.25233	1.404	1.48367	1.49067	1.449	1.528	1.49333	1.456	1.4075	1.35317	1.30583	1.26683	1.22617	1.2035	1.16	1.11867	1.0755	1.02283	0.967	0.929	0.868	0.808167	0.735833	0.686333	0.639833	0.593167	0.544333	0.487667	0.427667	0.353167	0.286667	0.246833	0.1865	0.120667	0.0493333	0.00116667	-0.0713333
	BCKDHAUCP1-KO-5	0.0731667	0.1865	0.233833	0.135167	0.0925	0	-0.0616667	0.311833	0.716333	1.099	1.31567	1.42117	1.461	1.46117	1.44267	1.41883	1.4225	1.431	1.44283	1.4465	1.44217	1.4285	1.437	1.429	1.423	1.40767	1.396	1.38183	1.35567	1.32717	1.28567	1.23467	1.19817	1.16733	1.13183	1.09467	1.0545	1.09	1.15167	1.13283	1.13167	1.14783	1.142	1.1555	1.09833	1.181	1.02683	0.879833
ΔTRec	Control-1	0.427292	0.362667	0.285167	0.199333	0.108	0	-0.116833	-0.199	-0.145	-0.0125	0.115333	0.215667	0.256333	0.267667	0.264167	0.239333	0.21	0.1905	0.195333	0.2225	0.237333	0.244667	0.270167	0.284833	0.281167	0.284	0.306667	0.326333	0.354167	0.391333	0.418333	0.448167	0.470167	0.480833	0.478167	0.477333	0.478	0.4775	0.481333	0.484167	0.469	0.451667	0.435833	0.435333	0.456	0.491333	0.508	0.5045
	Control-2	0.247417	0.266833	0.245833	0.188	0.109667	0	-0.0821667	-0.175333	-0.158667	-0.0653333	0.0441667	0.128333	0.180333	0.193667	0.170833	0.1155	0.05	-0.0246667	-0.102	-0.193	-0.294667	-0.253167	-0.034	0.1515	0.317	0.444667	0.553167	0.647833	0.697333	0.706667	0.714167	0.7075	0.690167	0.6815	0.633667	0.578	0.491667	0.397833	0.317167	0.295167	0.2045	0.097	-0.0111667	-0.118333	-0.227333	-0.332167	-0.439	-0.549167
	Control-3	0.231667	0.201667	0.155	0.106667	0.0536667	0	-0.052619	-0.103333	-0.136111	-0.143333	-0.128333	-0.0975	-0.0567949	0.120952	0.285667	0.439167	0.582255	0.716111	0.840614	0.955667	1.05976	1.15348	1.23775	1.31292	1.37687	1.43282	1.48019	1.51845	1.54822	1.57067	1.58715	1.59792	1.60379	1.60461	1.60081	1.59333	1.58194	1.56746	1.55167	1.53517	1.5163	1.49524	1.4726	1.44894	1.42411	1.39819	1.37167	1.34479
	Control-4	-0.00324242	0.0128333	0.0455	0.0616667	0.0438333	0	-0.0751667	-0.183333	-0.292	-0.278667	-0.153833	-0.004	0.1395	0.241167	0.3075	0.349	0.375	0.383333	0.371833	0.3535	0.322667	0.2865	0.246833	0.196	0.142333	0.095	0.0588333	0.0085	-0.045	-0.0966667	-0.141333	-0.176833	-0.208333	-0.244833	-0.2945	-0.34	-0.382833	-0.421	-0.464333	-0.515667	-0.555	-0.589	-0.607667	-0.636	-0.6795	-0.712167	-0.727833	-0.757667
	Control-5	0.352875	0.3255	0.272	0.1985	0.11	0	-0.138	-0.265	-0.403	-0.5365	-0.662333	-0.785167	-0.836833	-0.799833	-0.765	-0.716167	-0.660167	-0.620833	-0.500667	-0.433	-0.419333	-0.401	-0.377333	-0.349333	-0.340333	-0.336667	-0.338	-0.349833	-0.366333	-0.3845	-0.383167	-0.390167	-0.407333	-0.424333	-0.521833	-0.581333	-0.6035	-0.6185	-0.628	-0.629167	-0.6335	-0.639167	-0.637	-0.639833	-0.6475	-0.667167	-0.6875	-0.7315
	BCKDHAUCP1-KO-1	-0.571625	-0.463333	-0.344167	-0.230667	-0.1125	0	0.111	0.231	0.347667	0.446333	0.528667	0.599167	0.648667	0.682167	0.699167	0.695667	0.678833	0.643833	0.619167	0.613833	0.607	0.589667	0.568667	0.541	0.5105	0.4755	0.440333	0.402167	0.361	0.32	0.275167	0.2285	0.179667	0.127667	0.0726667	0.0173333	-0.0378333	-0.0936667	-0.149833	-0.2065	-0.266333	-0.328667	-0.385833	-0.446833	-0.512333	-0.576833	-0.635667	-0.694667
	BCKDHAUCP1-KO-2	0.224292	0.226667	0.2055	0.165	0.107	0	-0.106833	-0.160167	-0.152833	-0.0953333	-0.0606667	0.00733333	-0.00766667	-0.062	-0.1155	-0.167833	-0.220167	-0.2795	-0.338833	-0.399667	-0.4635	-0.527	-0.588	-0.649333	-0.709667	-0.769833	-0.828667	-0.888167	-0.947167	-1.00683	-1.06633	-1.12483	-1.18117	-1.24067	-1.29817	-1.35367	-1.416	-1.47567	-1.532	-1.58667	-1.643	-1.70067	-1.76167	-1.821	-1.87883	-1.93567	-1.99117	-2.047
	BCKDHAUCP1-KO-3	-0.0589167	0.00216667	0.042	0.0505	0.0361667	0	-0.0443333	-0.125	-0.230833	-0.324333	-0.3825	-0.419833	-0.439	-0.474333	-0.5405	-0.611833	-0.681833	-0.753167	-0.823667	-0.893333	-0.969333	-1.04633	-1.12333	-1.1945	-1.266	-1.33483	-1.403	-1.47967	-1.55333	-1.626	-1.69583	-1.77483	-1.8505	-1.92517	-1.99383	-2.06617	-2.13933	-2.20933	-2.29167	-2.35383	-2.294	-2.12	-1.95	-1.84467	-1.78267	-1.732	-1.68017	-1.62367
	BCKDHAUCP1-KO-4	-0.0464583	0.013	0.0715	0.0896667	0.0625	0	-0.0675	-0.150167	-0.247167	-0.2205	-0.117	-0.002	0.1025	0.181	0.22	0.217333	0.1935	0.154333	0.118	0.077	0.0308333	-0.0158333	-0.0581667	-0.1025	-0.1395	-0.178	-0.2205	-0.2655	-0.311667	-0.359333	-0.405	-0.457333	-0.511833	-0.572	-0.627333	-0.677167	-0.728833	-0.7815	-0.835833	-0.893833	-0.952667	-1.017	-1.06933	-1.12417	-1.18583	-1.24967	-1.30567	-1.36683
	BCKDHAUCP1-KO-5	0.00591667	0.108167	0.194833	0.187667	0.121833	0	-0.145833	-0.2535	-0.209833	-0.0556667	0.132	0.250167	0.308833	0.33	0.323833	0.307333	0.296333	0.301667	0.312333	0.316333	0.316167	0.310333	0.301167	0.286333	0.276	0.263333	0.251833	0.236833	0.213833	0.191167	0.156	0.112167	0.0701667	0.0368333	0.0015	-0.0366667	-0.0715	-0.0925	-0.0376667	-0.015	-0.0103333	0.00416667	0.0128333	0.0228333	0.0316667	0.0781667	0.1125	0.138
ΔTIng	Control-1	0.358458	0.349833	0.196167	0.163833	0.0913333	0	-0.0488333	-0.0503333	-0.0686667	-0.129	-0.167667	-0.136833	-0.091	-0.02	-0.0131667	0.00266667	-0.0095	0.0185	0.0408333	0.0436667	0.051	0.0786667	0.0465	0.0335	0.046	0.044	0.0261667	0.0311667	0.0161667	0.0125	0.00516667	0.0676667	0.0518333	0.0551667	0.094	0.0756667	0.0876667	0.0966667	0.0695	0.0488333	-0.00483333	-0.0136667	-0.036	-0.052	-0.0913333	-0.125667	-0.125667	-0.130167
	Control-2	0.139708	0.0331667	0.0606667	0.0173333	-0.019	0	-0.039	-0.0375	-0.0395	0.0958333	0.136667	0.190667	0.221	0.275167	0.3745	0.376333	0.417167	0.411833	0.400333	0.384833	0.331833	0.3675	0.449167	0.489667	0.634833	0.7005	0.743833	0.951333	1.01933	1.08683	1.1225	1.1235	1.12233	1.077	1.06333	1.05033	1.00133	0.929	0.838167	0.774	0.697167	0.629667	0.552667	0.444	0.370167	0.261333	0.135833	0.0665
	Control-3	0.398333	0.298333	0.218333	0.145833	0.0683333	0	-0.0616667	-0.126667	-0.186111	-0.243667	-0.292576	-0.331667	-0.360897	-0.280952	-0.203667	-0.128542	-0.0551961	0.0166667	0.0872807	0.155833	0.222619	0.288788	0.351377	0.410833	0.465933	0.514103	0.557222	0.594762	0.626954	0.654	0.675108	0.691771	0.704091	0.711863	0.71519	0.715	0.711036	0.704386	0.694487	0.683583	0.671992	0.659048	0.645078	0.630606	0.615667	0.599638	0.582376	0.564167
	Control-4	0.125121	0.144	0.177333	0.188333	0.119333	0	-0.120167	-0.22	-0.31	-0.402833	-0.455667	-0.477167	-0.470833	-0.452	-0.405	-0.3645	-0.329833	-0.294667	-0.280167	-0.2655	-0.285167	-0.315	-0.344833	-0.3785	-0.397667	-0.4305	-0.470833	-0.518167	-0.569167	-0.636667	-0.692833	-0.737667	-0.785	-0.825167	-0.866667	-0.916167	-0.963667	-1.02017	-1.07017	-1.11333	-1.1655	-1.2215	-1.26267	-1.30117	-1.35417	-1.38917	-1.4255	-1.4535
	Control-5	0.025375	0.0933333	0.0991667	-0.0433333	0.0325	0	-0.0993333	-0.288333	-0.317667	-0.476667	-0.553333	-0.647167	-0.780833	-0.6245	-0.8555	-0.930833	-0.906	-0.861333	-0.778667	-0.811333	-0.8	-0.772833	-0.815	-0.814667	-0.954833	-0.867833	-0.725167	-0.73	-0.770167	-0.790667	-0.846	-0.808	-0.856833	-0.8395	-0.806167	-0.816167	-0.883	-0.906167	-0.9285	-0.958167	-0.981833	-1.00467	-1.01483	-1.12867	-1.2055	-1.05467	-1.07433	-1.0635
	BCKDHAUCP1-KO-1	-0.582	-0.681167	-0.433333	-0.274333	-0.175	0	0.169833	0.215667	0.325833	0.417167	0.491167	0.517	0.542	0.485833	0.525667	0.520333	0.500333	0.465833	0.466333	0.443833	0.441	0.504833	0.484167	0.4675	0.452667	0.423	0.389	0.345667	0.314833	0.280333	0.246667	0.194667	0.167	0.118667	0.0643333	0.0161667	-0.0291667	-0.0831667	-0.133167	-0.187333	-0.238	-0.297333	-0.395167	-0.398667	-0.46	-0.517333	-0.583833	-0.628
	BCKDHAUCP1-KO-2	0.475042	0.3875	0.278833	0.168833	0.0808333	0	-0.0883333	-0.161167	-0.238167	-0.367667	-0.463	-0.496167	-0.512333	-0.540667	-0.569	-0.592833	-0.621667	-0.653667	-0.679167	-0.7035	-0.73	-0.760667	-0.790667	-0.829	-0.873	-0.914	-0.959667	-1.00933	-1.06083	-1.11033	-1.15867	-1.2125	-1.26317	-1.31017	-1.35917	-1.40633	-1.4545	-1.49883	-1.54167	-1.59033	-1.645	-1.70083	-1.74783	-1.79233	-1.84467	-1.89417	-1.938	-1.9755
	BCKDHAUCP1-KO-3	0.170958	0.222333	0.212667	0.170167	0.111	0	-0.0816667	-0.135833	-0.184833	-0.332167	-0.438833	-0.566833	-0.681833	-0.771	-0.838667	-0.907	-0.955667	-1.0155	-1.10717	-1.18433	-1.16317	-1.21217	-1.28083	-1.42067	-1.44783	-1.5725	-1.76517	-1.86783	-1.98117	-2.09333	-2.17867	-2.18717	-2.24583	-2.37867	-2.4835	-2.591	-2.68033	-2.717	-2.78783	-2.79467	-2.61733	-2.385	-2.21383	-2.1245	-2.07567	-2.024	-1.97433	-1.8595
	BCKDHAUCP1-KO-4	0.095	0.1255	0.156	0.1495	0.0898333	0	-0.0968333	-0.2025	-0.322667	-0.4425	-0.5405	-0.601833	-0.636167	-0.642667	-0.638	-0.631833	-0.636833	-0.6475	-0.665833	-0.687333	-0.712167	-0.746	-0.789	-0.846833	-0.903	-0.9555	-1.014	-1.07267	-1.13433	-1.19333	-1.25617	-1.31283	-1.37683	-1.4415	-1.51567	-1.58217	-1.65317	-1.7255	-1.79667	-1.86617	-1.931	-2.00283	-2.07117	-2.13817	-2.20217	-2.26967	-2.3345	-2.39867
	BCKDHAUCP1-KO-5	0.625917	0.650167	0.5905	0.380333	0.193833	0	-0.166	-0.338167	-0.535333	-0.696667	-0.790333	-0.848833	-0.871667	-0.8825	-0.894167	-0.916667	-0.936667	-0.967	-0.999167	-1.03317	-1.06767	-1.102	-1.11933	-1.13483	-1.15967	-1.209	-1.25817	-1.29333	-1.32683	-1.349	-1.37283	-1.40517	-1.4365	-1.47583	-1.5175	-1.55717	-1.60217	-1.63933	-1.671	-1.70533	-1.72283	-1.74133	-1.75283	-1.7575	-1.75383	-1.74817	-1.7515	-1.742
[truncated: 18 more columns]

## Sheet: Fig4B,C,D
	Total heat production (Δ˚C×min)	TMax following PGE2 ICV (˚C)	Velocity 5min (˚C min-1)
Control-1	73.1951	37.6435	0.210281
Control-2	38.1888	37.4412	0.239143
Control-3	109.657	38.1212	0.0579373
Control-4	141.469	37.519	0.60799
Control-5	39.859	37.3085	0.190438
BCKDHAUCP1-KO-1	18.4758	35.0493	0.123567
BCKDHAUCP1-KO-2	5.49767	36.6768	0.138738
BCKDHAUCP1-KO-3	6.51725	37.12	0.0329048
BCKDHAUCP1-KO-4	34.7097	36.7177	0.208048
BCKDHAUCP1-KO-5	58.3732	37.4622	0.298995

## Sheet: Fig4E
		Time after ICV injection of PGE2 (min)
		-5	-4	-3	-2	-1	0	1	2	3	4	5	6	7	8	9	10	11	12	13	14	15	16	17	18	19	20	21	22	23	24	25	26	27	28	29	30
ΔTBAT	UCP1 KO-1	-1.19433	-0.847667	-0.652	-0.425	-0.183833	0	0.211667	0.3755	0.532333	0.6495	0.748167	0.788667	0.651333	0.498167	0.374667	0.291	0.449333	0.451833	0.87	1.38833	1.588	1.4095	1.25517	1.08267	0.807667	0.776833	1.00233	1.117	0.879333	0.626	0.594667	0.447667	0.104167	-0.1635	-0.3945	-0.592333
	UCP1 KO-2	-0.0821667	-0.188333	-0.211833	-0.194167	-0.118333	0	0.00516667	-0.0333333	-0.0463333	-0.0191667	-0.0138333	-0.0285	-0.0296667	0.04	-0.0125	-0.0498333	-0.0846667	-0.136833	-0.204333	-0.2745	-0.309667	-0.368	-0.444333	-0.520333	-0.601167	-0.693667	-0.783	-0.864667	-0.953333	-1.036	-1.12217	-1.22167	-1.34367	-1.4305	-1.54683	-1.65517
	UCP1 KO-3	-0.1615	-0.172667	-0.1335	-0.103	-0.0981667	0	-0.0915	-0.253333	-0.291333	-0.298833	-0.3305	-0.346667	-0.360833	-0.4085	-0.458167	-0.5055	-0.550667	-0.5815	-0.614667	-0.6385	-0.649167	-0.6545	-0.670167	-0.681667	-0.695333	-0.702333	-0.709667	-0.704167	-0.698333	-0.698833	-0.677333	-0.687167	-0.675667	-0.677833	-0.675	-0.681667
	UCP1 KO-4	0.0155556	0.0395556	0.0288889	0.0369841	0.0455556	0	0.0185556	-0.0553535	-0.101944	-0.145983	-0.185159	-0.234444	-0.305069	-0.374444	-0.443333	-0.513392	-0.556944	-0.536825	-0.587626	-0.594444	-0.543194	-0.578844	-0.589444	-0.604444	-0.639444	-0.646513	-0.287111	-0.55767	-0.668507	-0.673535	-0.706503	-0.695587	-0.724444	-0.733904	-0.754181	-0.749316
	UCP1 KO-5	-0.163056	-0.0355556	-0.0555556	-0.0884127	-0.119306	0	0.00644444	0.00444444	-0.00555556	0.0159829	0.0144444	0.0497778	0.0606944	0.0744444	0.0827778	0.103918	0.232444	0.275873	0.325808	0.357053	0.396528	0.424844	0.455214	0.479259	0.504087	0.525479	0.548444	0.564444	0.583819	0.593535	0.601797	0.606159	0.614444	0.616336	0.617339	0.614701
ΔTRec	UCP1 KO-1	-1.15967	-0.7925	-0.682833	-0.618	-0.438167	0	0.3335	0.43	0.421333	0.376333	0.3	0.205667	0.0935	-0.0303333	-0.135667	-0.239667	-0.334833	-0.422	-0.462167	-0.4535	-0.391333	-0.3715	-0.4185	-0.495833	-0.6095	-0.7355	-0.824833	-0.857333	-0.914333	-1.03317	-1.18467	-1.2995	-1.43633	-1.59633	-1.765	-1.94067
	UCP1 KO-2	-0.417667	-0.223167	-0.105333	-0.0523333	-0.015	0	0.00333333	0.019	0.0203333	0.0273333	0.0303333	0.0301667	0.0188333	-0.00383333	-0.0305	-0.0613333	-0.0993333	-0.145	-0.201167	-0.270833	-0.3295	-0.3915	-0.469	-0.542833	-0.622667	-0.703167	-0.7945	-0.887333	-0.978833	-1.07967	-1.16633	-1.27233	-1.38867	-1.50967	-1.62633	-1.74183
	UCP1 KO-3	0.147333	0.1495	0.123167	0.094	0.0516667	0	-0.047	-0.119	-0.207667	-0.294333	-0.3735	-0.446667	-0.498667	-0.554333	-0.610833	-0.661833	-0.710167	-0.751	-0.787167	-0.8165	-0.846333	-0.869667	-0.890833	-0.904	-0.9285	-0.94	-0.954833	-0.956833	-0.966833	-0.971167	-0.9785	-0.990333	-0.982833	-0.987	-0.987833	-0.982167
	UCP1 KO-4	0.0947222	0.128222	0.103889	0.0579365	0.0172222	0	-0.0367778	-0.0668687	-0.101944	-0.151624	-0.204206	-0.259111	-0.328403	-0.388366	-0.462778	-0.531462	-0.598278	-0.641587	-0.689596	-0.72256	-0.747361	-0.766178	-0.808162	-0.837407	-0.855278	-0.905709	-0.922444	-0.933907	-0.957778	-0.987475	-0.992484	-1.00778	-1.01361	-1.02426	-1.0412	-1.04803
	UCP1 KO-5	0.465	0.366	0.281667	0.185714	0.1	0	-0.072	-0.126364	-0.140833	-0.152308	-0.151429	-0.161333	-0.170625	-0.177647	-0.180556	-0.189474	-0.186	-0.167619	-0.144545	-0.118696	-0.100833	-0.0836	-0.0607692	-0.047037	-0.0392857	-0.0213793	-0.005	0.00516129	0.0240625	0.0327273	0.0402941	0.0408571	0.0413889	0.0402703	0.0407895	0.0402564

## Sheet: Fig4F
	OCR (pmol min-1 μg-1)
Time (min)	0.911985	6.49063	12.124	17.8603	23.4315	29.0524	34.7371	40.3209	45.9024	51.4749	57.0518
	Basal			Vehicle or Valine			NE
Control+vehichle-1	51.4624	52.3907	52.8647	51.8081	52.2871	51.0808	61.8405	65.1197	66.1931	66.708	66.2563
Control+vehichle-2	58.9482	59.4352	59.1787	57.3979	57.3392	57.1877	71.6259	74.8711	75.9008	75.3954	75.0528
Control+vehichle-3	56.5773	56.8167	57.0351	55.402	55.9491	55.4391	66.1642	70.0072	72.1934	73.1709	74.1121
Control+vehichle-4	55.3394	57.3655	57.9431	56.2303	57.3213	57.1413	67.827	72.9133	74.9458	75.7214	76.1369
Control+vehichle-5	55.1101	56.6547	56.7907	54.5075	55.5084	55.4394	64.9229	69.5125	71.2545	71.9191	72.4232
Control+vehichle-6	44.7891	44.9215	44.9377	43.2619	44.3553	44.0707	51.7116	55.1881	56.0819	56.5117	56.9421
Control+vehichle-7	42.7011	43.6528	43.7837	41.5239	42.594	42.2076	49.4807	52.9093	54.6051	54.9579	55.1308
Control+vehichle-8	50.2822	51.1317	51.0052	49.5479	50.5935	49.9416	59.3318	63.557	65.6375	66.1772	66.4971
Control+vehichle-9	54.3721	55.2534	55.3298	53.2245	54.2846	53.8018	64.8079	69.2921	72.3775	73.4446	74.0063
Control+vehichle-10	55.3014	56.884	57.4126	54.3401	55.8481	55.7634	67.2485	71.0303	73.5418	74.6906	75.066
Control+Val-1	51.1419	52.0054	52.5104	52.6457	55.2495	56.5958	71.8625	74.8059	77.5547	78.6157	79.0623
Control+Val-2	50.6895	52.3168	52.9189	51.567	55.3069	57.1741	68.9536	75.8697	78.3686	79.3589	79.417
Control+Val-3	59.9506	61.5375	61.789	59.3439	63.7099	65.1065	79.9871	86.7863	88.77	89.0282	88.7001
Control+Val-4	63.587	64.7188	64.7823	64.6325	68.488	70.6005	91.1293	100.615	99.3103	95.8382	93.2671
Control+Val-5	44.3176	45.9175	46.2414	45.4446	48.5853	50.4251	64.5359	71.5081	74.3787	74.2518	74.6081
Control+Val-6	57.5772	57.2497	56.7493	56.2624	59.0957	60.4753	80.1162	86.0971	83.9562	79.7543	76.4234
Control+Val-7	67.8401	69.2934	69.4549	68.5227	73.0296	75.1324	99.1312	94.7125	81.3034	74.0797	69.9525
Control+Val-8	43.4195	44.5935	44.8504	43.7179	46.3447	47.977	61.4957	67.1683	68.2737	67.4809	67.531
Control+Val-9	46.9512	47.4223	47.4611	47.5052	49.9369	50.7367	67.2863	73.2624	76.8914	78.0289	78.4134
Control+Val-10	40.3541	41.1778	41.2043	40.7378	42.9524	43.9273	55.4091	59.6751	61.2479	61.8793	62.7773
UCP1 KO+vehicle-1	32.3447	32.5149	32.9193	33.754	32.3476	31.0803	34.1266	34.1472	34.0707	33.7637	33.5171
UCP1 KO+vehicle-2	32.246	31.5526	30.8732	30.3834	29.4934	28.1505	30.645	30.5896	31.0393	31.1947	31.1883
UCP1 KO+vehicle-3	32.3863	31.6957	31.4033	30.8617	30.9261	30.0126	32.5197	32.9587	33.0404	32.8585	32.9167
UCP1 KO+vehicle-4	32.6298	32.5018	32.3673	31.8472	31.5936	30.7604	32.7312	33.448	33.5598	33.1724	33.2376
UCP1 KO+vehicle-5	36.1267	36.0899	35.6283	35.6114	35.36	34.578	36.8848	37.1345	37.1896	37.1741	36.7404
UCP1 KO+vehicle-6	33.1866	32.8203	32.4284	30.8523	31.8993	31.2648	31.484	33.6054	33.9035	33.124	33.422
UCP1 KO+vehicle-7	31.4656	31.5631	31.0394	30.8874	31.0329	30.1838	31.8876	32.4426	32.6163	32.258	32.2129
UCP1 KO+vehicle-8	40.5869	37.9644	37.9854	34.6563	33.5547	34.2881	36.3998	38.9912	39.8335	40.5007	40.4823
UCP1 KO+vehicle-9	50.2518	48.9724	48.0607	47.1496	47.2869	45.9337	49.4359	50.2129	49.2714	49.3586	49.2075
UCP1 KO+vehicle-10	43.9835	42.656	42.414	42.2068	41.6963	40.7654	43.6455	43.7303	43.2245	43.6295	43.5967
UCP1 KO+Val-1	29.829	29.8688	29.6159	29.5618	29.0879	28.5372	30.9839	31.4456	30.9805	30.6048	30.7466
UCP1 KO+Val-2	31.4734	31.083	30.8637	30.2847	30.7535	29.8615	31.9473	32.8198	32.5967	32.3202	32.0136
UCP1 KO+Val-3	30.9747	30.3438	29.7523	29.0696	29.4512	29.0875	31.544	32.4626	32.2925	31.4253	31.0976
UCP1 KO+Val-4	39.4721	38.7802	38.9927	38.3428	38.7851	38.969	40.4564	41.0426	41.0377	40.9322	40.6641
UCP1 KO+Val-5	33.7627	33.7731	33.5788	33.6327	33.9354	33.4548	36.1846	37.0972	36.871	36.6767	36.4715
UCP1 KO+Val-6	44.6341	43.5	43.315	42.4622	43.4468	42.7114	44.3914	45.2859	45.3065	44.9819	44.8129
UCP1 KO+Val-7	46.0577	45.433	45.266	44.5396	45.1878	44.5963	47.175	47.3116	47.4875	47.0639	47.075
UCP1 KO+Val-8	32.2346	32.6464	32.0984	31.4855	32.2725	31.4011	33.7508	34.8647	34.7549	34.1971	34.0095
UCP1 KO+Val-9	45.6846	45.0755	45.1616	45.5875	45.3144	43.983	47.2639	47.2331	46.1387	46.2552	45.9967
UCP1 KO+Val-10	48.3299	47.6992	47.6642	46.5663	47.3689	47.0511	50.027	50.0103	49.5883	49.1286	48.7736

## Sheet: Fig4G
	OCR (pmol min-1 μg-1)
Time (min)	0.91187	6.48693	12.0607	17.7443	23.3613	28.9416	34.6685	40.2486	45.8257	51.4402	57.0176
	Basal			Vehicle or Valine			NE
Control+vehichle-1	36.667	38.0266	38.0061	36.6842	37.5098	36.9781	46.5105	47.1846	46.8482	45.9599	45.1732
Control+vehichle-2	53.2087	54.4503	54.7462	52.9817	53.8423	52.88	63.128	64.1384	63.0621	61.6682	61.1484
Control+vehichle-3	39.2792	40.3284	40.8131	38.7037	39.7403	39.4746	43.584	45.4456	45.403	45.4576	45.4225
Control+vehichle-4	50.6052	51.2171	51.2602	49.4684	50.201	49.9995	58.6087	60.6536	60.6911	59.8939	59.3801
Control+vehichle-5	45.5766	46.7611	45.982	43.4245	44.7377	44.7269	53.9683	54.948	51.3549	50.5298	50.3053
Control+vehichle-6	46.7088	53.7802	45.9545	43.943	46.1006	46.377	55.2256	57.7404	57.2651	56.2032	55.5033
Control+vehichle-7	52.5873	53.6489	53.7081	52.0991	53.378	53.4922	67.0188	69.7635	69.9708	68.8461	68.1548
Control+vehichle-8	53.6173	54.7957	54.6285	52.1541	48.3222	52.8976	64.9191	68.0878	68.2476	67.6977	70.4094
Control+vehichle-9	45.0346	46.6195	46.7319	45.9262	46.9287	46.5158	58.5838	59.3905	59.0107	57.8454	57.1746
Control+Val-1	42.1667	42.4131	42.8618	41.9156	44.3735	44.7637	59.8641	63.8425	64.471	62.7059	61.4823
Control+Val-2	55.5359	57.1846	57.705	55.3286	59.2277	60.3598	82.6755	89.512	91.9344	89.8318	87.9163
Control+Val-3	43.8195	42.4722	41.7841	37.6229	41.1012	41.2654	54.6881	61.9443	62.8722	61.8231	61.2338
Control+Val-4	46.62	47.6294	48.0147	44.8063	48.6728	49.7648	65.4542	71.2144	72.8861	71.9003	71.0168
Control+Val-5	61.8484	62.1977	62.3427	59.6238	62.787	63.6132	87.5115	94.0093	95.0513	93.9587	92.1634
Control+Val-6	43.926	45.5022	45.2206	43.2298	46.6792	47.2041	62.6569	67.559	69.305	68.9897	67.6707
Control+Val-7	59.5664	60.8759	61.2083	60.5123	64.243	65.0785	92.3089	98.6507	99.315	97.2494	95.2249
Control+Val-8	54.5025	55.8958	56.1116	53.675	58.0075	58.1336	78.9529	84.1975	84.3285	83.3552	82.4491
UCP1 KO+vehicle-1	52.3499	49.8011	49.1756	48.5654	49.3675	49.3538	57.4292	58.7074	58.1621	57.3124	57.2022
UCP1 KO+vehicle-2	46.5406	46.9333	46.4368	45.6709	47.0263	46.1727	54.1931	54.1838	54.4272	53.3391	53.1817
UCP1 KO+vehicle-3	50.3399	49.7655	48.7187	47.5497	47.0855	47.1753	51.4818	52.2874	52.4289	52.3293	52.1349
UCP1 KO+vehicle-4	46.295	46.4828	45.3573	39.8523	39.3788	43.4029	47.2981	48.7335	47.8387	47.0583	47.2801
UCP1 KO+vehicle-5	40.6726	39.747	39.3665	37.6949	37.8151	38.0305	42.1379	43.2606	43.6653	43.4256	43.3149
UCP1 KO+vehicle-6	34.965	35.2256	34.6342	34.3132	34.3383	34.2951	39.5924	40.9543	40.6814	40.366	39.6346
UCP1 KO+Val-1	44.4027	44.5538	45.0606	44.5562	46.7591	47.3097	61.9379	65.2669	65.242	64.563	63.7618
UCP1 KO+Val-2	46.057	47.3012	46.8386	45.6924	49.1059	50.126	64.5336	69.07	69.6877	69.5999	68.9407
UCP1 KO+Val-3	43.0088	44.0941	44.4554	43.5252	45.4504	46.6684	59.7162	64.1409	64.5442	62.9334	61.5007
UCP1 KO+Val-4	52.8652	53.1085	53.2364	53.2249	56.278	57.0373	70.7462	73.7818	73.4265	72.522	71.416
UCP1 KO+Val-5	47.7226	47.8932	47.9429	47.0504	49.9927	51.1611	65.2641	70.0925	70.7183	69.5605	68.4323
UCP1 KO+Val-6	46.55	48.3452	48.4353	46.986	50.0492	50.8872	58.5879	61.7695	61.9153	62.1181	61.8539
UCP1 KO+Val-7	36.4415	37.3566	37.1024	35.9407	38.3134	39.0966	48.2641	51.1908	51.2944	51.0553	50.4805
UCP1 KO+Val-8	35.0132	36.1322	35.8228	35.0408	36.1578	36.4849	40.2036	43.0421	43.6349	43.7116	43.4868
UCP1 KO+Val-9	40.8089	41.6729	41.7921	42.189	44.002	44.4094	54.4616	55.7342	55.9718	55.8084	55.285

## Sheet: Fig4H
	Relative Serca2b mRNA
shScr-1	1.43585
shScr-2	0.663657
shScr-3	0.330223
shScr-4	1.57027
sh-Atp2a2 #1 -1	0.107664
sh-Atp2a2 #1 -2	0.124175
sh-Atp2a2 #1 -3	0.0802404
sh-Atp2a2 #1 -4	0.239486
sh-Atp2a2 #1 -5	0.292197
sh-Atp2a2 #1 -6	0.240067
sh-Atp2a2 #2 -1	0.111233
sh-Atp2a2 #2 -2	0.113226
sh-Atp2a2 #2 -3	0.153312
sh-Atp2a2 #2 -4	0.363244
sh-Atp2a2 #2 -5	0.454235
sh-Atp2a2 #2 -6	0.151355

## Sheet: Fig4I
	[1-14C] Val oxidation (relative to ctrl-vehicle)
sh-Scr-Veh-1	0.655313
sh-Scr-Veh-2	0.996125
sh-Scr-Veh-3	0.657149
sh-Scr-Veh-4	1.00836
sh-Scr-Veh-5	1.62941
sh-Scr-Veh-6	1.05364
sh-Scr-NE-1	1.37941
sh-Scr-NE-2	1.56574
sh-Scr-NE-3	1.3036
sh-Scr-NE-4	1.93414
sh-Scr-NE-5	1.97098
sh-Atp2a2 #1-Veh-1	0.425291
sh-Atp2a2 #1-Veh-2	0.262854
sh-Atp2a2 #1-Veh-3	0.452364
sh-Atp2a2 #1-Veh-4	0.74426
sh-Atp2a2 #1-Veh-5	0.494696
sh-Atp2a2 #1-Veh-6	0.613325
sh-Atp2a2 #1-NE-1	0.450833
sh-Atp2a2 #1-NE-2	0.352801
sh-Atp2a2 #1-NE-3	0.624099
sh-Atp2a2 #1-NE-4	0.765447
sh-Atp2a2 #1-NE-5	0.593891
sh-Atp2a2 #1-NE-6	0.943273
sh-Atp2a2 #2-Veh-1	0.64624
sh-Atp2a2 #2-Veh-2	0.720824
sh-Atp2a2 #2-Veh-3	0.312233
sh-Atp2a2 #2-Veh-4	0.904736
sh-Atp2a2 #2-Veh-5	0.949672
sh-Atp2a2 #2-Veh-6	1.0817
sh-Atp2a2 #2-NE-1	0.813178
sh-Atp2a2 #2-NE-2	0.716626
sh-Atp2a2 #2-NE-3	1.15218
sh-Atp2a2 #2-NE-4	1.0331
sh-Atp2a2 #2-NE-5	1.35172
