# Supplementary material for: Metabolic flexibility via mitochondrial BCAA carrier SLC25A44 is required for optimal fever
Source: eLife. 2021 May 4;10:e66865. doi: 10.7554/eLife.66865 (PMC8137140; doi:10.7554/eLife.66865)
Supplement: Figure 5—source data 1. [file elife-66865-fig5-data1.xlsx]

## Sheet: Fig5A
	NE-stimulated OCR (%basal)
Time (min)	0.943802	6.62871	12.3292	18.1395	23.8324	29.5277	35.2186	40.929	46.6202	52.3178	58.0217	63.7188	69.425	75.2181	80.9087	86.5988	92.2668	97.9371
	Basal			NE										Veh or Leu
Control_Veh-1	100	103.433	94.8965	123.086	127.453	125.58	126.205	117.766	122.42	111.772	116.398	111.823	114.802	110.571	114.56	116.13	109.77	114.829
Control_Veh-2	100	107.372	96.6619	129.082	132.895	126.903	125.277	126.048	126.055	124.744	123.196	122.556	122.095	119.93	118.579	117.636	117.818	118.479
Control_Veh-3	100	109.052	96.8738	131.576	136.675	133.321	132.575	130.71	132.217	130.277	127.06	127.901	125.107	121.364	119.571	118.027	114.831	121.872
Control_Veh-4	100	107.258	97.7252	129.531	132.888	127.305	131.453	129.812	129.667	125.456	125.256	125.263	121.616	118.744	119.376	119.652	115.975	117.73
Control_Veh-5	100	101.183	93.0924	120.591	125.042	124.032	124.607	122.659	121.135	117.331	115.148	116.382	114.037	113.581	114.85	112.934	110.938	111.289
Control_Veh-6	100	101.481	94.7212	123.79	126.857	125.528	127.685	123.099	122.85	120.913	118.917	120.717	116.706	121.866	118.741	117.03	115.289	116.047
Control_Veh-7	100	105.268	95.7957	125.47	128.996	126.045	128.064	127.686	125.57	124.599	121.535	121.375	120.431	118.168	118.767	116.076	116.23	115.492
Control_Veh-8	100	105.402	97.8846	127.887	132.666	130.315	130.485	127.867	126.793	123.38	119.737	120.527	117.71	119.253	119.584	118.155	113.606	115.474
Control_Veh-9	100	105.567	98.1744	124.713	133.475	130.481	130.419	130.336	126.984	128.616	125.346	125.681	125.039	118.939	123.558	120.919	120.018	122.182
Control_Leu-1	100	106.19	92.5891	120.711	127.855	125.678	128.015	127.422	125.391	120.941	118.414	119.246	115.472	127.056	124.789	125.245	124.314	123.181
Control_Leu-2	100	103.169	96.0976	128.669	132.084	131.266	132.986	128.549	128.632	125.639	123.212	123.097	118.213	128	129.711	126.026	123.984	124.355
Control_Leu-3	100	107.368	97.2764	127.239	131.752	128.377	130.654	128.572	128.596	126.783	124.093	124.233	120.918	123.262	121.264	121.33	116.974	119.26
Control_Leu-4	100	105.047	98.4278	126.562	132.062	131.596	131.326	130.735	128.142	126.331	124.732	124.592	120.694	124.843	129.114	126.809	124.457	123.741
Control_Leu-5	100	108.466	100.036	132.62	139.606	136.443	139.426	135.547	131.742	131.663	131.48	131.311	128.758	132.016	137.167	135.337	133.423	133.191
Control_Leu-6	100	111.337	95.6851	125.794	131.266	127.198	125.633	123.359	126.162	122.801	127.42	121.903	126.117	131.099	132.879	132.091	129.212	138.622
Control_Leu-7	100	109.903	98.9638	127.821	132.037	130.635	128.954	127.26	127.22	128.117	122.247	127.755	122.92	133.94	134.865	134.596	129.86	130.957
Control_Leu-8	100	109.474	98.1282	130.459	133.046	136.582	139.845	133.895	135.261	130.837	130.659	129.421	127.354	135.365	132.661	130.016	126.709	128.778
Control_Leu-9	100	117.799	102.302	137.223	143.143	143.007	146.77	144.407	141.962	140.246	140.092	135.62	134.566	135.894	133.513	136.347	128.202	132.313

## Sheet: Fig5B
	NE-stimulated OCR (%basal)
Time (min)	0.943802	6.62871	12.3292	18.1395	23.8324	29.5277	35.2186	40.929	46.6202	52.3178	58.0217	63.7188	69.425	75.2181	80.9087	86.5988	92.2668	97.9371
	Basal			NE										Veh or Leu
MBC KO_Veh-1	100	101.393	101.079	122.985	126.71	125.31	121.905	120.633	120.746	119.452	119.967	117.97	119.073	113.591	110.125	110.166	109.187	107.561
MBC KO_Veh-2	100	97.4896	99.7521	122.168	126.797	124.558	126.62	125.318	122.947	121.073	119.816	117.121	115.735	116.779	112.53	115.689	117.398	114.08
MBC KO_Veh-3	100	99.9699	99.0461	125.89	126.934	118.622	119.236	120.667	117.121	115.874	116.147	112.193	114.311	116.013	105.296	106.035	110.31	105.427
MBC KO_Veh-4	100	96.7606	96.8053	120.654	124.681	120.851	118.07	119.839	115.392	112.217	113.291	108.705	111.378	107.765	104.373	105.345	106.023	105.069
MBC KO_Veh-5	100	97.6843	99.1622	119.807	123.229	119.116	118.349	117.763	114.358	111.144	110.746	110.51	111.65	110.811	107.395	105.38	107.166	102.438
MBC KO_Veh-6	100	97.2839	98.1477	123.517	123.444	121.81	122.575	118.86	117.641	115.46	116.468	112.931	112.035	114.29	108.384	109.777	109.286	109.554
MBC KO_Veh-7	100	96.2653	98.4893	121.961	127.141	126.649	125.006	122.008	118.216	115.727	116.168	115.032	111.847	119.016	111.783	114.527	113.473	111.605
MBC KO_Veh-8	100	98.4609	99.4572	121.111	126.684	125.635	126.604	124.263	123.637	120.852	118.091	120.256	118.778	112.277	108.651	108.829	111.853	110.27
MBC KO_Veh-9	100	101.413	102.495	122.066	127.962	126.4	124.262	122.896	120.867	114.955	119.631	119.257	119.221	111.78	109.714	110.446	111.824	112.815
MBC KO_Leu-1	100	95.9216	95.0456	110.448	116.38	116.985	117.112	114.357	114.489	109.902	109.275	109.068	108.878	103.314	102.391	103.447	106.164	102.386
MBC KO_Leu-2	100	99.5239	96.6357	119.774	119.584	117.238	114.033	110.484	110.081	105.481	105.565	102.758	101.564	98.8795	96.0068	95.4774	99.7855	97.0601
MBC KO_Leu-3	100	99.6682	98.4446	122.704	124.948	123.359	123.186	119.558	118.607	117.94	115.881	113.95	112.634	109.929	105.064	104.512	106.439	106.108
MBC KO_Leu-4	100	99.7706	103.436	117.11	120.995	119.132	119.977	122.229	120.714	119.324	120.213	115.921	115.403	112.392	107.097	111.083	113.955	111
MBC KO_Leu-5	100	100.67	101.217	125.017	129.673	131.657	129.924	127.238	123.305	122.647	122.067	121.711	119.638	120.184	112.824	114.852	117.874	111.813
MBC KO_Leu-6	100	98.4888	99.0779	135.037	131.015	130.921	129.456	126.121	124.684	121.143	119.833	117.641	115.83	125.64	114.353	114.09	118.305	115.9
MBC KO_Leu-7	100	100.143	99.7346	117.483	117.354	119.452	116.434	111.401	107.95	103.502	102.396	103.851	100.749	104.502	101.47	101.553	99.3219	94.2028
MBC KO_Leu-8	100	100.391	101.505	124.844	122.65	125.734	121.02	123.566	117.751	116.94	116.894	114.92	117.42	116.515	110.656	108.427	112.784	107.401
MBC KO_Leu-9	100	100.952	102.213	131.984	131.011	132.027	130.786	126.981	124.483	124.997	125.243	119.621	119.649	117.05	104.863	108.728	109.218	108.046

## Sheet: Fig5C
	NE-stimulated OCR (%basal)
	Control	MBC KO
Vehicle-1	129.652	120.631
Vehicle-2	123.608	115.285
Vehicle-3	132.419	120.138
Vehicle-4	139.606	113.333
Vehicle-5	128.306	111.023
Vehicle-6	132.568	119.638
Valine-1	150.295	118.311
Valine-2	140.75	130.223
Valine-3	168.876	118.449
Valine-4	138.496	119.344
Valine-5	152.178	124.561
Valine-6	143.19	135.589
Leucine-1	141.149	119.713
Leucine-2	140.076	121.659
Leucine-3	146.248	117.353
Leucine-4	145.202	116.337
Leucine-5	135.059	115.757
Leucine-6	176.528	125.993
Isoleucine-1	146.255	118.932
Isoleucine-2	152.958	116.427
Isoleucine-3	144.8	119.695
Isoleucine-4	147.126	117.793
Isoleucine-5	155.656	119.404
Isoleucine-6	144.015	125.634

## Sheet: Fig5D
	OCR (pmol μg-1 min-1)
Time (min)	0.918419	6.55314	12.1658	17.9129	23.4997	29.1113	34.8736	40.5559	46.1933	51.8186	57.4331	63.0273	68.666	74.3567	79.9832	85.6254
	Basal			Vehicle or Val			NE
Control-vehicle-1	44.8515	48.5106	50.7106	47.7685	49.9498	52.2692	57.5085	61.8845	62.2664	62.5271	61.802	62.7621	62.9137	62.4596	62.5547	62.7611
Control-vehicle-2	45.084	47.7541	49.4983	48.7168	51.0118	52.9193	57.7192	61.1331	62.301	62.9833	62.8512	63.0642	63.1067	62.2442	61.7582	61.262
Control-vehicle-3	51	53.6652	54.7017	53.2772	54.4262	54.0886	59.2833	59.3098	57.7646	57.5693	57.3948	57.8489	57.749	56.9108	56.6395	56.5043
Control-vehicle-4	49.2212	51.5213	52.7089	50.9052	51.8546	52.836	58.8432	59.6214	58.8661	58.3612	58.1526	57.9908	57.1644	56.6072	55.8666	55.2123
Control-vehicle-5	50.721	52.9808	54.3556	52.8337	52.7292	52.1196	59.5016	61.1951	60.2751	60.3309	59.4611	58.5354	58.6493	57.4952	57.0208	55.6888
Control-Val-1	47.5029	49.8981	51.1766	48.332	50.7617	52.4769	58.4823	62.2514	63.4115	63.9965	63.6277	63.8795	64.0707	63.4488	63.3211	63.6128
Control-Val-2	48.7342	51.7753	53.1937	50.0795	52.7267	55.0396	62.6594	66.6586	67.6938	67.7944	67.6515	67.5859	67.3481	66.6039	66.1629	65.7597
Control-Val-3	54.5184	56.4598	56.7631	52.2894	55.1524	56.3268	66.9055	69.8344	69.3855	68.7787	67.3517	67.2206	67.2264	66.662	66.328	66.1785
Control-Val-4	45.3613	48.7929	50.5034	47.6841	49.3977	50.1511	57.1793	59.4105	59.8623	60.6427	61.0529	61.6331	61.7256	61.6551	61.3819	61.6371
Control-Val-5	54.3113	57.1552	58.4837	55.0643	56.5311	56.9078	70.7777	73.9191	74.4389	74.7865	74.852	74.9883	74.5719	73.5907	73.2717	72.0231

## Sheet: Fig5E
	OCR (pmol μg-1 min-1)
Time (min)	0.918419	6.55314	12.1658	17.9129	23.4997	29.1113	34.8736	40.5559	46.1933	51.8186	57.4331	63.0273	68.666	74.3567	79.9832	85.6254
	Basal			Vehicle or Val			NE
MBC KD-vehicle-1	44.1326	46.5705	48.3634	46.672	48.6736	50.2057	53.0306	55.7499	54.761	53.8032	53.2933	52.7731	52.0689	50.6563	50.57	50.382
MBC KD-vehicle-2	44.9324	47.6067	49.2048	47.1102	48.9332	50.6117	54.9486	56.5923	53.7372	53.1965	53.3666	52.8052	52.703	51.8159	52.3268	51.9987
MBC KD-vehicle-3	48.8593	51.1739	52.5998	50.5837	50.2238	50.4604	56.0888	57.6846	56.5642	55.1949	54.8512	54.2718	53.3383	51.9627	51.3381	51.1011
MBC KD-vehicle-4	42.5604	45.1529	46.8409	44.584	45.8112	46.3927	49.9397	51.6812	50.2786	49.5462	49.1482	48.5967	47.8888	47.0415	46.4418	46.3166
MBC KD-vehicle-5	44.3818	46.7733	48.0776	45.9454	46.4517	47.5572	51.6491	52.8175	52.026	51.1611	50.6039	49.7649	49.0715	48.1291	47.3967	46.9227
MBC KD-Val-1	42.1182	44.1737	45.8346	43.819	46.6452	49.4268	53.3075	55.9205	55.0241	54.6934	55.6093	55.6864	55.3217	54.765	55.0109	55.1163
MBC KD-Val-2	38.6461	40.5723	42.1449	40.6929	43.1084	45.8109	48.6409	51.0899	50.5296	49.9661	49.5243	48.8223	48.4371	47.8506	47.9214	47.83
MBC KD-Val-3	45.4851	48.1115	49.426	46.5638	49.1464	50.9142	53.8182	54.921	52.9469	54.6031	55.3692	55.3553	55.1112	54.5736	54.7462	54.789
MBC KD-Val-4	44.2925	47.3839	48.9549	46.4194	48.8511	50.7769	55.4107	57.7346	57.0387	55.5956	56.2355	55.6378	54.2683	52.2469	54.5581	54.0069
MBC KD-Val-5	44.9129	47.8618	49.5625	47.0792	49.0245	50.1874	55.1141	55.9313	55.1843	54.959	55.1138	54.7784	54.3761	53.6142	53.9624	53.7972

## Sheet: Fig5F
	Lactate (mM)
Control-vehicle-1	4.38869
Control-vehicle-2	3.66957
Control-vehicle-3	2.63779
Control-NE-1	7.19482
Control-NE-2	6.31937
Control-NE-3	5.23287
MBC KO-vehicle-1	4.07603
MBC KO-vehicle-2	6.9447
MBC KO-vehicle-3	4.5841
MBC KO-NE-1	9.09033
MBC KO-NE-2	9.37173
MBC KO-NE-3	8.53145
