# Supplementary material for: Metabolic flexibility via mitochondrial BCAA carrier SLC25A44 is required for optimal fever
Source: eLife. 2021 May 4;10:e66865. doi: 10.7554/eLife.66865 (PMC8137140; doi:10.7554/eLife.66865)
Supplement: Figure 6—figure supplement 1—source data 1. [file elife-66865-fig6-figsupp1-data1.xlsx]

## Sheet: FigS2C
	Relative metabolite abundance (z-score)
	Control-1	Control-2	Control-3	Control-4	MBC KO-1	MBC KO-2	MBC KO-3	MBC KO-4
α-KG	1.48086	-0.66687	0.570006	0.926888	0.268894	-1.61389	-0.615064	-0.350826
Suc	-1.44159	0.748966	1.31107	-0.163771	-0.149626	1.19542	-0.888153	-0.61231
Mal	-0.285606	0.265212	2.31876	0.079947	-0.406381	-0.637593	-0.627489	-0.706849
Cit	1.66965	0.0378602	-1.38601	0.643591	0.352083	-1.22696	0.302856	-0.393076
