# Supplementary material for: Metabolic flexibility via mitochondrial BCAA carrier SLC25A44 is required for optimal fever
Source: eLife. 2021 May 4;10:e66865. doi: 10.7554/eLife.66865 (PMC8137140; doi:10.7554/eLife.66865)
Supplement: Figure 6—source data 1. [file elife-66865-fig6-data1.xlsx]

## Sheet: Fig6B
	Relative metabolite abundance (z-score)
	Control-1	Control-2	Control-3	Control-4	MBC KO-1	MBC KO-2	MBC KO-3	MBC KO-4
Leu	0.235616	0.0450988	2.03365	0.651236	-1.06874	-0.71638	-0.466893	-0.71359
Val	-0.866154	0.884522	1.67948	0.144035	0.0537082	0.270469	-1.40244	-0.763624
Ile	-1.14827	0.910669	1.62201	-0.178159	0.0896362	0.545629	-1.22748	-0.614042
KIC	0.651793	-0.522099	1.79798	0.792938	-0.964281	-1.02509	-0.0549162	-0.676333
Glu	0.571208	1.34706	0.192227	1.27295	-0.363634	-1.12777	-0.883707	-1.00834
Ala	1.07495	0.528378	1.38625	0.520581	-0.415234	-0.985747	-1.00882	-1.10035
Asp	0.088842	1.42951	-0.497916	1.54984	-0.996226	-1.02658	-0.0473737	-0.500097

## Sheet: Fig6C
	Normalized KIC abundance
	M0	M1	M2	M3	M4	M5	M6
Control-1	0.00215947	n/d	n/d	n/d	0.000585329	0.00343206	0.0866094
Control-2	0.00194528	n/d	n/d	n/d	0.000755941	0.00159523	0.0309626
Control-3	0.00506229	n/d	n/d	n/d	0.00087152	0.00496696	0.138203
Control-4	0.00320174	n/d	n/d	n/d	0.000802182	0.0036789	0.091986
MBC KO-1	0.00134634	n/d	n/d	n/d	0.000581253	0.000840201	0.0109567
MBC KO-2	0.000865155	n/d	n/d	n/d	0.000532246	0.000822486	0.00816755
MBC KO-3	0.00178195	n/d	n/d	n/d	0.000668787	0.00237853	0.0532306
MBC KO-4	0.00148848	n/d	n/d	n/d	0.000684161	0.00136101	0.024286

## Sheet: Fig6D
	Normalized Glu abundance						Normalized Ala abundance					Normalized Asp abundance
	M0	M1	M2	M3	M4	M5	M0	M1	M2	M3	M4	M0	M1	M2	M3	M4
Control-1	1.05468	2.00941	0.770588	1.07115	0.193148	0.074261	0.27573	0.339418	0.0163058	n/d	n/d	0.546002	0.576454	0.0833372	0.0567398	n/d
Control-2	1.0639	2.31375	0.878013	1.27151	0.239945	0.0949316	0.24946	0.275316	0.0161419	n/d	n/d	0.578351	0.687556	0.107219	0.0723662	n/d
Control-3	0.896828	1.89287	0.750496	1.03252	0.189548	0.0725584	0.328595	0.339192	0.0158944	n/d	n/d	0.466025	0.548808	0.0986466	0.0650147	n/d
Control-4	1.03849	2.29417	0.86027	1.27847	0.234138	0.0911576	0.234094	0.290884	0.0148183	n/d	n/d	0.579316	0.717848	0.100027	0.066763	n/d
MBC KO-1	0.846579	1.77887	0.645938	0.864708	0.151779	0.0534471	0.191678	0.179106	0.014122	n/d	n/d	0.488906	0.499086	0.0776335	0.0476245	n/d
MBC KO-2	0.672049	1.48791	0.541172	0.745784	0.15504	0.0565862	0.156535	0.120449	0.0137645	n/d	n/d	0.453438	0.500864	0.0953216	0.0561289	n/d
MBC KO-3	0.694443	1.62721	0.548381	0.807565	0.147448	0.0521234	0.117621	0.157133	0.0119299	n/d	n/d	0.503378	0.60313	0.0889687	0.0490926	n/d
MBC KO-4	0.658674	1.54432	0.556446	0.794724	0.155854	0.0552625	0.124849	0.133994	0.0126247	n/d	n/d	0.482887	0.555447	0.0910871	0.051087	n/d

## Sheet: Fig6E
	ΔNormalized metabolite abundance
	α-KG	Suc	Mal	Cit
Control_0h-1	0.0207801	-0.198037	-0.103965	0.423178
Control_0h-2	-0.0286364	0.080895	-0.0389037	-0.0602642
Control_0h-3	-0.000177511	0.152469	0.203655	-0.482107
Control_0h-4	0.00803389	-0.0353273	-0.0607866	0.119193
Control_0.5h-1	1.32285	1.53364	0.728066	1.54857
Control_0.5h-2	1.55848	1.71103	0.995151	1.7479
Control_0.5h-3	2.92361	0.996978	0.938555	2.11605
Control_0.5h-4	3.43846	0.177315	1.17781	2.57288
Control_1h-1	3.03239	1.1651	0.987774	1.92561
Control_1h-2	2.36915	1.46954	1.00055	1.57434
Control_1h-3	3.16042	0.114048	0.852759	2.18677
Control_1h-4	2.98164	0.0313697	0.794059	2.10443
MBC KO_0h-1	0.0194795	-0.0045787	0.0222293	0.175791
MBC KO_0h-2	-0.0238408	0.166691	-0.00508081	-0.292024
MBC KO_0h-3	-0.000859234	-0.0986183	-0.00388737	0.161207
MBC KO_0h-4	0.00522054	-0.0634941	-0.0132611	-0.044974
MBC KO_0.5h-1	3.00777	0.250115	1.08776	3.92493
MBC KO_0.5h-2	1.33716	-0.112977	0.467035	1.89235
MBC KO_0.5h-3	1.3972	0.704043	0.463703	1.34571
MBC KO_0.5h-4	0.654914	0.866322	0.407585	1.49572
MBC KO_1h-1	1.372	0.0920989	0.244261	1.80101
MBC KO_1h-2	0.572932	0.713465	0.344677	1.43104
MBC KO_1h-3	0.92437	0.749014	0.31528	1.45715
MBC KO_1h-4	1.11168	0.095685	0.330683	1.71949

## Sheet: Fig6F
	Relative metabolite abundance (z-score)
	Control-1	Control-2	Control-3	Control-4	MBC KO-1	MBC KO-2	MBC KO-3	MBC KO-4
α-KG	1.02966	0.411704	1.14895	0.982369	-0.542138	-1.28665	-0.959205	-0.784684
Suc	1.11635	1.65945	-0.758648	-0.906141	-0.849444	0.259031	0.322447	-0.843047
Mal	1.11633	1.14808	0.78083	0.634969	-1.08024	-0.830716	-0.903762	-0.865488
Cit	0.655939	-0.381424	1.42718	1.18402	-0.134239	-1.2268	-1.14971	-0.37496

## Sheet: Fig6G,H
	13C ion counts				MPE (%)
	α-KG	Suc	Mal	Cit	α-KG	Suc	Mal	Cit
Control-1	0.134768	0.03165	0.0198871	0.0987612	0.867927	0.507599	0.370298	0.533757
Control-2	0.086734	0.0321239	0.0165192	0.0744434	0.710239	0.430892	0.304691	0.454047
Control-3	0.123607	0.0100343	0.016536	0.103516	0.764506	0.494159	0.342324	0.515779
Control-4	0.112294	0.00892939	0.0135111	0.0977829	0.735226	0.524632	0.29399	0.499451
MBC KO-1	0.0444839	0.00743645	0.0054001	0.0757201	0.627149	0.406805	0.294316	0.448056
MBC KO-2	0.0184483	0.0139313	0.00593484	0.0599469	0.595571	0.322969	0.265381	0.408357
MBC KO-3	0.0298344	0.016544	0.00560964	0.0582095	0.61451	0.371154	0.26477	0.392318
MBC KO-4	0.0375247	0.0080805	0.00621982	0.0739286	0.647958	0.438326	0.285276	0.450482
